1 **Full Title:** The role of prisons in disseminating tuberculosis in Brazil: a genomic epidemiology study

2 **Short Title:** Prison dissemination of tuberculosis

3 **Authors:**

4 Katharine S. Walter PhD<sup>1</sup>, Paulo César Pereira dos Santos BS<sup>2</sup>, Thais Oliveira Gonçalves BS<sup>3</sup>, Brunna  
5 Oliveira da Silva BS<sup>2</sup>, Andrea da Silva Santos PhD<sup>2</sup>, Alessandra de Cássia Leite MSc<sup>2</sup>, Alessandra Moura  
6 da Silva BA<sup>4</sup>, Flora Martinez Figueira Moreira MSc<sup>2</sup>, Roberto Dias de Oliveira PhD<sup>5</sup>, Everton Ferreira  
7 Lemos PhD<sup>4</sup>, Eunice Cunha PhD<sup>3</sup>, Yiran E. Liu BS<sup>1,6</sup>, Albert Ko MD<sup>7</sup>, Caroline Colijn PhD<sup>8</sup>, Ted Cohen  
8 MD<sup>7</sup>, Barun Mathema PhD<sup>9</sup>, Julio Croda MD<sup>4,7,10</sup>†, Jason R. Andrews MD<sup>1</sup>†

9 †These authors contributed equally to this work.

10 <sup>1</sup>Division of Infectious Diseases and Geographic Medicine, Stanford University School of Medicine;  
11 Stanford, United States.

12 <sup>2</sup>Health Sciences Research Laboratory, Federal University of Grande Dourados; Dourados, Brazil.

13 <sup>3</sup>Laboratory of Bacteriology, Central Laboratory of Mato Grosso do Sul; Campo Grande, Brazil.

14 <sup>4</sup>School of Medicine, Federal University of Mato Grosso do Sul, School of Medicine; Campo Grande,  
15 Brazil.

16 <sup>5</sup>Nursing Course, State University of Mato Grosso do Sul; Dourados, Brazil.

17 <sup>6</sup>Cancer Biology Graduate Program, Stanford University School of Medicine; Stanford, United States.

18 <sup>7</sup>Department of Epidemiology of Microbial Diseases, Yale School of Public Health; New Haven, United  
19 States.

20 <sup>8</sup>Department of Mathematics, Simon Fraser University; Burnaby, Canada.

21 <sup>9</sup>Department of Epidemiology, Columbia University Mailman School of Public Health; New York,  
22 United States.

23 <sup>10</sup> Mato Grosso do Sul Office, Oswaldo Cruz Foundation; Campo Grande, Brazil.

24 **Corresponding Author:** [kwalter@stanford.edu](mailto:kwalter@stanford.edu) (KSW)

25 **Word count:** 4585

26 **Abstract**

27 **Background:** Globally, prisons are high-incidence settings for tuberculosis. Yet the role of prisons as  
28 reservoirs of *M. tuberculosis*, propagating epidemics through spillover from prisons to surrounding  
29 communities, has been difficult to measure directly.

30 **Methods and Findings:** To quantify the role of prisons in driving wider community *M. tuberculosis*  
31 transmission, we conducted prospective genomic surveillance in Central West Brazil from 2014 to 2019.  
32 We whole genome sequenced 1,152 *M. tuberculosis* isolates collected during active and passive  
33 surveillance inside and outside prisons and linked genomes to detailed incarceration histories. We applied  
34 multiple phylogenetic and genomic clustering approaches and inferred timed transmission trees. We  
35 found that *M. tuberculosis* sequences from incarcerated and non-incarcerated people were closely related  
36 in a maximum likelihood phylogeny. The majority (70.8%; 46/65) of genomic clusters including people  
37 with no incarceration history also included individuals with a recent history of incarceration. Among  
38 cases in individuals with no incarceration history, 50.6% (162/320) were in clusters that included  
39 individuals with recent incarceration history, suggesting that transmission chains often span prisons and  
40 communities. We identified a minimum of 18 highly probable spillover events, *M. tuberculosis*  
41 transmission from people with a recent incarceration history to people with no prior history of  
42 incarceration, occurring in the state's four largest cities and across sampling years. We additionally found  
43 that frequent transfers of people between the state's prisons creates a highly connected prison network  
44 that likely disseminates *M. tuberculosis* across the state.

45 **Conclusions:** We developed a framework for measuring spillover from high-incidence environments to  
46 surrounding communities by integrating genomic and spatial information to reconstruct tuberculosis  
47 transmission chains. Our findings indicate that, in this setting, prisons serve not only as disease reservoirs,  
48 but also disseminate *M. tuberculosis* across highly connected prison networks, both amplifying and  
49 propagating *M. tuberculosis* risk in surrounding communities.

50 **Abstract word count:** 294

51 **Key words:** tuberculosis, epidemiology, genomics, disease reservoir, spillover, prisons

## 52 **Introduction**

53 Tuberculosis remains one of the leading causes of death by an infectious disease and led to 1.4  
54 million deaths in 2019.[1] Locating where *M. tuberculosis* transmission occurs is critical for developing  
55 public health interventions to block transmission and prevent future infections. Yet in high-incidence  
56 settings, where most tuberculosis is transmitted remains unknown.[2–7] Built environments often shape  
57 *M. tuberculosis* transmission risk, and high-transmission settings like prisons, hospitals, and mines may  
58 have epidemiological impacts that transcend their walls[8–10], serving as institutional amplifiers of  
59 infection.[11,12] In particular, the conditions of detention, including severe overcrowding, poor  
60 ventilation, poor nutrition, and limited access to healthcare, put incarcerated people at elevated risk of  
61 many infectious diseases, including tuberculosis.[8–10]

62 Globally, incidence of tuberculosis in incarcerated populations is more than ten times that in the  
63 general population.[9,13] The role of prisons in driving community tuberculosis epidemics is of particular  
64 concern in Central and South America, where the incarcerated population has increased by over 200%  
65 since 2000 and tuberculosis cases among the incarcerated population have increased by over 269% [14].  
66 Alarmingly, increasing tuberculosis notifications within prisons more than offset declines in tuberculosis  
67 outside prisons across the region[14].

68 The full impact of increasing incarceration rates on the tuberculosis epidemic in the Americas and  
69 elsewhere is underestimated by total incident cases within prisons. Many people are infected in prison,  
70 but only diagnosed later.[12,15,16] Further, spillover may occur when incarcerated people, prison staff, or  
71 visitors are infected within high-incidence prison environments and transmit *M. tuberculosis* onwards in  
72 communities outside prison. Previous studies have found that the excess risk of tuberculosis within  
73 prisons extends to surrounding communities[17,18] and that *M. tuberculosis* genotypes responsible for  
74 jail and prison outbreaks are also found in the surrounding communities[15,17,19,20]. Because  
75 transmission is rarely observed, however, it is often difficult to link community cases to transmission  
76 from prisons and previous studies have largely been associative.

77 Pathogen genomes can be powerfully harnessed to infer high-resolution evolutionary and  
78 transmission histories, including who-infected-whom.[21] One previous study in Georgia used *M.*  
79 *tuberculosis* genomes to identify frequent transmission of multi-drug resistant tuberculosis from prisons  
80 to surrounding communities.[22] However, studies have not yet combined *M. tuberculosis* genomic,  
81 epidemiologic, and location data to reconstruct transmission linkages between potential institutional  
82 amplifiers and the community. To quantify the contribution of prison spillover to tuberculosis  
83 transmission in the community, we conducted prospective genomic surveillance for tuberculosis in the  
84 Central West Brazilian state of Mato Grosso do Sul. We integrated *M. tuberculosis* genomes with detailed  
85 incarceration histories and took multiple phylogenetic and genomic clustering approaches to reconstruct  
86 spillover events, transmission of tuberculosis from prisons to the community.

87

## 88 **Methods**

### 89 **Study design**

90 We conducted population-based tuberculosis surveillance in the state of Mato Grosso do Sul in  
91 Central West Brazil from January 2014 through May 2019. Surveillance included active screening in  
92 three of the largest prisons in the state as well as ongoing passive surveillance focused on the two largest  
93 cities in the state, and three cities at the state's border with Paraguay and Bolivia (Fig. 1a,b; **S1 Text**). All  
94 participants provided written consent, and this study was conducted with the approval of the Research  
95 Ethics Committee from the Federal University of Grande Dourados, Federal University of Mato Grosso  
96 do Sul and National Research Ethics Committee (CONEP) (CAAE 37237814.4.0000.5160,  
97 2676613.3.1001.5160, and 26620619.6.0000.0021) and Stanford University Institutional Review Board  
98 (IRB-40285) (**S1 Text**).

### 99 **Incarceration history**

100 We obtained permission from the Mato Grosso do Sul state prison administration agency,  
101 Agência Estadual de Administração do Sistema Penitenciário, to access a database of all prison entries,

102 exits, and transfers within the criminal justice record system from January 1, 2005 through December 31,  
103 2018 (**S1 Text**).

104

### 105 **Laboratory diagnosis and culture**

106 All sputum specimens collected in the participating laboratories were examined by microscopy or  
107 GeneXpert® MTB/RIF, decontaminated with sodium hydroxide (NaOH), and inoculated in Ogawa-  
108 Kudoh culture medium. Cultures were incubated at 37°C for up to eight weeks and checked weekly for  
109 visible colonies at the participating laboratories. Microbial species determination was made with the  
110 MPT64 protein detection-based immunochromatographic rapid test (SD Bioline Kit, Standard  
111 Diagnostics, Inc., Korea). DNA was extracted from cultured isolates with the manual CTAB (Cetyl  
112 trimethylammonium bromide) method and whole genome sequenced on an Illumina NextSeq (2 x 151-  
113 bp).

114

### 115 **Whole genome sequencing**

116 We sequenced whole *M. tuberculosis* genomes from cultured isolates on an Illumina NextSeq (2  
117 x 151-bp). Sequence data is available on the Sequence Read Archive, in BioProject PRJNA671770. We  
118 applied variant calling methods closely following those described in Menardo et al.[23] to be consistent  
119 with the methods used for molecular clock estimation (**S1 Text**).

120

### 121 **Phylogenetic and Bayesian evolutionary analysis**

122 We fit a maximum likelihood tree with RAxML-ng 1.0.1 and rooted the tree on two Lineage 1  
123 isolates from this study.[24] We clustered genomes using a 12-SNP threshold. For each cluster including  
124 three or more isolates, we fit Bayesian trees with BEAST 2.6.2[25] with a strict clock, constant coalescent  
125 population size model using tuberculosis notification dates to calibrate tips (**S1 Text**).

126

### 127 **Transmission inference**

128 *M. tuberculosis* phylogenetic trees represent patterns of evolutionary relatedness between the  
129 consensus bacterial genomes sampled from different individuals. Because most outbreaks are  
130 incompletely sampled and individuals may be infected with diverse populations of *M. tuberculosis*,  
131 phylogenies do not represent the underlying history of transmission.[21] We used TransPhylo[21] to infer  
132 transmission linkages—including unsampled hosts—that were consistent with the underlying timed  
133 phylogenies and epidemiology of tuberculosis (i.e. generation time and sampling intervals). TransPhylo  
134 samples transmission trees that are consistent with timed phylogenetic trees and epidemiological priors  
135 governing the distribution of likely *M. tuberculosis* generation times (time between subsequent infections)  
136 and sampling time (time from an individual’s infection to diagnosis) (**S1 Text**).

137 We then combined transmission trees with incarceration histories to identify spillover events from  
138 prisons to surrounding communities. We defined spillover events as transmission that occurred from an  
139 individual with a history of current or former incarceration to the community, including individuals with  
140 no incarceration history and prior incarceration. We considered transmission probabilities >50% as  
141 evidence of spillover and included spillover events no more than two degrees removed from prisons.  
142 TransPhylo infers transmission linkages including transmission to and from unsampled hosts and thus  
143 does not require that all transmission events be observed. Therefore, we are able to quantify the minimum  
144 number of transmission events, but not estimate the total role of spillover on community transmission.

145

## 146 **Results**

### 147 **Tuberculosis and incarceration trends in Mato Grosso do Sul**

148 Brazil’s incarcerated population grew by 107% (from 361,402 to 748,009) from 2005 to 2019, an  
149 increase closely paralleled in the Central West state of Mato Grosso do Sul, where the incarcerated  
150 population grew by 115% (7,891 to 16,976) over the same period (Fig. 1a-c). In 2019, prisons in the state  
151 were at 203% occupancy. While the state’s notification rate of new and retreatment tuberculosis in the  
152 general population (38 per 100,000) is similar to Brazil’s national tuberculosis notification rate (40 per

153 100,000) in 2019,[26] the notification rate within prisons was 43 times as high (1,666 per 100,000), again  
154 similar to Brazil's national notification rate within prisons (1,596 per 100,000) in 2019 (Fig. 1d,e).

155

156 **Fig 1. Tuberculosis is increasingly concentrated within prisons in Mato Grosso do Sul, Brazil.** (a)

157 Map of Brazil with states colored by the 2019 incarceration rate with Mato Grosso do Sul outlined in

158 black. (b) Map of Mato Grosso do Sul state with the cities with passive surveillance only and where

159 active surveillance was additionally conducted within prisons. (c) The incarcerated population size in

160 Mato Grosso do Sul grew by 142% from 2005 to 2020, increasing from 7,891 to 19,065 people. (d) Mato

161 Grosso do Sul state's annual new and retreatment tuberculosis notifications, colored by incarceration

162 status and (e) the notification rate per 100,000 people for the incarcerated population and non-

163 incarcerated populations from 2009 to 2019. The y-axis is log-scaled. The mean tuberculosis notification

164 rate was more than 46 times greater among the incarcerated population compared to the non-incarcerated

165 population. The green and yellow bars (d) and (e) indicate the period of active surveillance in prisons in

166 Campo Grande and Dourados respectively.

167

168 **Population-based genomic surveillance across Mato Grosso do Sul state**

169 From 2014 to 2019, 3,491 new and retreatment cases of tuberculosis were reported in the Campo

170 Grande and Dourados, the two largest cities in Mato Grosso do Sul, Brazil. Of these, 1,249 had positive

171 cultures and we sequenced 787 *M. tuberculosis* isolates. We sequenced additional isolates from three

172 other cities in the state and from earlier years in Dourados for a total of 1,090 isolates from unique

173 tuberculosis notifications (Fig. 1b). Whole genome sequences (WGS) for a total of 1,043 isolates met our

174 coverage and quality criteria (Methods). We excluded 10% (108 of 1043) of isolates with mixed

175 infection, resulting in 935 high-quality genomes from 935 unique tuberculosis episodes from 918

176 individuals.

177 Of the 935 isolates in our analyses, 50% (465 of 935) were from patients who were incarcerated

178 at the time of tuberculosis notification; 16% (150 of 935) were formerly incarcerated; and 34% (320 of

179 935) of the study population did not have an incarceration history. Among those who did not have an  
180 incarceration history, 32 people reported contact with incarcerated individuals. Additional population  
181 characteristics are in Table E1. Isolates were largely from *M. tuberculosis* lineage 4 (932 of 935) and  
182 predominantly fell into three sub-lineages: lineage 4.1, 4.3, and 4.4 (Fig. 2). We focus subsequent  
183 analyses of transmission on lineage 4. Overall, we found a low prevalence of antibiotic resistance across  
184 isolates, with 93.7% of isolates susceptible to all antibiotics (Fig. 2).

185

186 **Fig 2. *M. tuberculosis* isolates from incarcerated and non-incarcerated people are closely related in**  
187 **Mato Grosso do Sul, Brazil.** A maximum likelihood phylogeny of 932 tuberculosis isolates from  
188 Lineage 4 inferred from a multiple sequence alignment of 19,753 SNPs and rooted on two Lineage 1  
189 isolates from this study. Branch lengths are in units of substitutions per site. Branches are colored by sub-  
190 lineage. From the inside, rings are colored by incarceration status, antimicrobial resistance prediction, and  
191 genomic cluster (Methods). “Other” resistance indicates resistance to at least one antibiotic other than  
192 isoniazid or rifampicin. The clade containing the largest predicted genomic cluster (Cluster 5), including  
193 170 isolates, is highlighted in purple.

194

### 195 **Phylogenetic structure of *M. tuberculosis* from prisons and the community**

196 In a maximum likelihood phylogeny (Fig. 2), *M. tuberculosis* isolates sampled from incarcerated  
197 and non-incarcerated people are distributed across the tree and do not form distinct clades, indicating  
198 recent shared evolutionary history of isolates sampled from prisons and the community. Terminal branch  
199 lengths, a proxy for the degree of recent transmission,[27] were significantly longer for isolates from  
200 people with no incarceration history at the time of tuberculosis notification ( $9.4 \times 10^{-4}$  substitutions/site)  
201 compared to isolates from incarcerated individuals ( $2.2 \times 10^{-4}$ ;  $p < 0.001$ ) or formerly incarcerated  
202 individuals ( $3.8 \times 10^{-4}$ ;  $p=0.019$ ), suggesting that individuals with an incarceration history were more  
203 likely to be recently infected, although this could alternatively reflect a higher rate of genomic sampling  
204 (Fig. S1; permutation test in **S1 Text**).



205 We tested for phylogenetic signal in incarceration status of sampled tuberculosis patients—  
206 whether incarceration status was distributed randomly across the tree—with Fritz’s  $D$ [28], a test  
207 “clumping” in observed traits. The  $D$  statistic is equal to 1 if the trait is distributed randomly across tree  
208 tips with respect to the phylogeny and 0 if the trait is consistent with a pattern of clumping consistent with  
209 Brownian motion of the trait along the phylogenetic tree.

210 We predicted that if prison and community epidemics were distinct, incarceration status would  
211 exhibit an extremely clumped pattern on the *M. tuberculosis* phylogeny, with separate clades including  
212 samples from incarcerated people and community members. Conversely, if transmission between prisons  
213 and the community occurred just as frequently as transmission within prisons, there would be a random  
214 pattern of incarceration status across the phylogeny. We found that incarceration status had a moderate  
215 phylogenetic signal (Fritz’s  $D=0.59$ ), indicating a pattern of shared evolutionary history of isolates  
216 collected from individuals with and without an incarceration history, with some degree of “clumping”  
217 with respect to incarceration status.

218

### 219 **Genomic clustering of *M. tuberculosis* from prisons and the community**

220 Patterns of genomic relatedness are often used to infer potential recent transmission; *M.*  
221 *tuberculosis* isolates that are more closely genetically related are hypothesized to be more likely linked  
222 through recent transmission[29]. To identify potential transmission clusters, we applied a commonly used  
223 12-SNP threshold [29], including all isolates within the threshold distance of at least one other clustered  
224 isolate. Eighty-three percent (777 of 935) of the isolates fell into 84 genomic clusters (each including 2 to  
225 170 isolates), providing evidence that notifications were largely attributable to recent, local transmission  
226 rather than travel-associated importation or re-activation of genetically distinct latent infections (Fig. 2).  
227 Isolates from incarcerated people were more frequently clustered (93.3%, 434/465), than those from  
228 formerly incarcerated (86.0%, 129 of 150;  $p < 0.0001$ ), or never incarcerated people (66.9%, 214 of 320;  $p$   
229  $< 0.0001$ ), again suggesting more recent transmission within prisons.

230 We predicted that if prison and community-associated epidemics were distinct, isolates from the  
231 community would be most closely related to and cluster with other isolates from the community and vice  
232 versa. The majority (70.8%; 46/65) of genomic clusters including people with no incarceration history  
233 also included individuals with a recent history of incarceration. Among cases in individuals with no  
234 incarceration history, 50.6% (162/320) were in clusters that included individuals with recent incarceration  
235 history, suggesting that transmission chains often span prisons and communities.

236 We found a similar pattern of clustering of isolates from community members and individuals  
237 with an incarceration history when using an alternative 5-SNP threshold for genomic clustering[30]. With  
238 this threshold, of the 80 clusters, 56 included isolates from people with no incarceration history and  
239 78.6% (44 of 56) also included isolates from people with an incarceration history. Among all tuberculosis  
240 cases occurring among individuals with no incarceration history, 46.9% (150 of 320) were in 5-SNP  
241 clusters that included individuals with incarceration history.

242

### 243 ***A. M. tuberculosis* clone spans prisons and the community across the state**

244 The largest potential transmission cluster, including 170 isolates sampled from September 2010  
245 to April 2019, was distributed across the state, including cases found across state's two largest cities,  
246 Campo Grande and Dourados, as well as the smaller cities Corumbá (on the Bolivian border) and Ponta  
247 Porã (on the Paraguayan border) (Fig. 1b, Fig. 3a). The cluster had a most recent common ancestor in  
248 1996 (95% HPD: 1989-2003; Fig. 3a), indicating that it had circulated for approximately 23 years before  
249 the most recent samples were collected. 103 isolates were from people incarcerated at the time of  
250 diagnosis, 35 from people formerly incarcerated, and 32 from people with no incarceration history at the  
251 time of tuberculosis notification.

252 As observed in other clusters, isolates from people who are currently and formerly incarcerated  
253 were closely genetically related—and often, identical—to isolates from people who were not incarcerated  
254 at the time of notification, suggesting they are linked through recent transmission (Fig. 3b). The three  
255 largest haplotypes (identical sequences), including 14, 9, and 8 samples, were dominated by isolates from

256 people who were incarcerated. Each haplotype also included isolates from people who were formerly  
257 incarcerated and from people with no incarceration history, indicating very recent transmission between  
258 incarcerated individuals and individuals in the community.

259

260 **Fig 3. A single, recently emerged *M. tuberculosis* clone spans prisons and the community across the**  
261 **major cities Mato Grosso do Sul state.** (a) A Bayesian time-calibrated phylogeny of the largest sampled  
262 genomic cluster of 170 isolates. The cluster emerged approximately 23 years before the most recently  
263 sampled isolate, with a most recent common ancestor in 1996 (95% HPD: 1989-2003). Tip point color  
264 indicates patient's incarceration status at the time of tuberculosis notification. Annotation bar colors  
265 indicate city. Grey error bars indicate the 95% Bayesian highest posterior density intervals for node date.  
266 Clade posterior support values are shown on the middle of branches for clades with posterior support >  
267 0.5. (b) A haplotype network of the single largest genomic cluster, including 170 isolates. Nodes  
268 represent unique haplotypes and are scaled to size. Points along branches indicate SNP distances between  
269 haplotypes. Node color indicates incarceration status at the time of diagnosis.

270

### 271 **Prison networks disseminate *M. tuberculosis* across space**

272 We hypothesized that the criminal justice system's frequent transfer of people between prisons  
273 and jails could disseminate TB across the state. We analyzed movements in the state's incarceration  
274 database and found that the average duration of incarceration was 230 days in a prison and 25 days in a  
275 jail. The incarceration database documents 7,982 mean yearly transfers between prisons (including closed  
276 and semi-open prisons) from 2015-2018 in a prison population of 17,221 in August 2018, including  
277 frequent transfers between cities across the state (Fig. 4a).

278 To investigate the role of the criminal justice system in disseminating infection, we tracked the  
279 spread of the largest sampled *M. tuberculosis* cluster (Fig. 3) across prisons in Mato Grosso do Sul (Fig.  
280 4b). From early 2011 to 2014, sampled isolates from the cluster were concentrated in the maximum  
281 security prison in Dourados, after which it was identified within two prisons in Campo Grande and then

282 exported to prisons and jails in other cities. The cluster was not contained within the state's prison  
283 network; notified tuberculosis cases among community members outside of prison occurred over the  
284 duration of the clusters' state-wide spread.

285

286 **Fig 4. Prisons disseminate tuberculosis through the frequent movement of people between prisons.**

287 (a) Incarceration locates people within highly connected contact networks. Map of Mato Grosso do Sul  
288 state with orange points indicating the 21 prisons which most frequently transfer people between prisons.  
289 Edges are colored by the mean number of yearly transfers made between prisons from 2015-2018,  
290 including transfers in both directions. Edges were drawn between prison pairs with more than 10 transfers  
291 in the study period. Transfers between prisons within a city are not shown. (b) An *M. tuberculosis* clone  
292 (depicted in Figure 3) spreads throughout multiple prisons, jails, and the community. Each line represents  
293 an individual patient infected with an isolate in the largest genomic cluster, ordered by notification date.  
294 Line color indicates patient location, determined by matching patient names with the state incarceration  
295 database (Methods). Points indicate TB notification dates; point color indicates patient location at the  
296 time of TB notification. Individuals with notification dates after December 31, 2018 are not shown.

297

298 **Transmission trees reveal frequent spillover of infection**

299 We further investigated recent transmission in the state by inferring probabilistic transmission  
300 trees representing who-infected-whom for the 84 identified *M. tuberculosis* genomic clusters with  
301 TransPhylo[21]. Because our sampling of the TB epidemic in Mato Grosso do Sul was incomplete and we  
302 did not observe the majority of transmission events resulting in sampled cases, we quantified the  
303 minimum number of recent infections attributable to prison spillover rather than the total role of spillover  
304 on the community epidemic. We identified a minimum of 16.8% (18 of 107) infections among never  
305 incarcerated individuals were directly attributable to observed spillover from prisons. Observed spillover  
306 of infection to never or formerly incarcerated individuals occurred across the state in the four largest cities  
307 sampled (Campo Grande, Dourados, Ponta Pora, and Corumba) and every year, from 2014-2019.

308 Together, these findings indicate that spillover of *M. tuberculosis* infection from prisons to surrounding  
309 communities is frequent. The result is that the 0.84% of the state's population incarcerated at a given time  
310 (22,706 of 2,713,147 in 2017) or 2.6% currently or formerly incarcerated at a given time (71,703 of  
311 2,713,147), have a disproportionate effect on TB transmission outside of prisons.

312

### 313 **Transmission inferences are sensitive to epidemiological priors**

314 We conducted a sensitivity analysis to determine the effect of epidemiological priors (Table S2)  
315 on transmission inferences for the largest genomic cluster (170 isolates). Transmission probabilities  
316 inferred for pairs of individuals were closely correlated across generation time priors (Pearson's  $r$ : 0.94 –  
317 0.98, Fig. S3) and sampling time priors (Pearson's  $r$ : 0.84 – 0.98, Fig. S4), although the total number of  
318 observed transmission events was strongly influenced by both priors (Figure S5). This suggests that, as  
319 expected, epidemiological priors impact the magnitude of inferred transmission probabilities rather than  
320 the identity of predicted transmission pairs. As expected, the minimum number of observed spillover  
321 events in the largest cluster were sensitive to epidemiological priors, when transmission was defined as a  
322 transmission probability greater than or equal to 50%, and ranged from 0 (short sampling and generation  
323 times) to 28 (medium generation time and very long sampling time) (Fig. S6).

324

### 325 **Discussion**

326 Here, we linked intensive *M. tuberculosis* genomic surveillance to detailed individual-level  
327 incarceration histories, allowing us to reconstruct high-resolution population-wide tuberculosis  
328 transmission in Central West Brazil, a setting with an extreme disparity in tuberculosis incidence between  
329 prisons and surrounding communities. We found that *M. tuberculosis* sequences from incarcerated and  
330 non-incarcerated individuals were closely evolutionarily related and sometimes identical. Locally  
331 circulating *M. tuberculosis* clones spanned prisons and the community, and the majority of genomic  
332 clusters included individuals with and without a recent history of incarceration. In reconstructed  
333 transmission trees, we found evidence of frequent spillover of infection in all the major cities in the state

334 and across sampling years, indicating that spillover is not the effect of a single prison but a widespread  
335 phenomenon. We found that frequent transfers of people between prisons in Mato Grosso do Sul, Brazil  
336 creates a closely connected prison contact network that likely facilitates the spread of *M. tuberculosis*  
337 between prisons and may disseminate infection risk across the state.

338 While alarming disparities in tuberculosis incidence between prisons and surrounding  
339 communities are well-documented,[9,13] it has been more challenging to directly link tuberculosis cases  
340 in the community to spillover from prisons. Previous studies of the broader effects of prisons on general  
341 TB epidemics have largely been associative. Here, we describe a probabilistic framework for identifying  
342 spillover events that can be applied more generally to measure the impact of high-transmission  
343 environments such as mines or hospitals on tuberculosis transmission in the general population. Our  
344 finding of frequent and widespread spillover events demonstrates the outsized effect of prison  
345 environments on community-wide *M. tuberculosis* transmission. This also suggests that the introduction  
346 of *M. tuberculosis* lineages or resistance mutations into prisons is likely to be a source of community  
347 epidemics. Our finding of the likely role of prison transfers in disseminating *M. tuberculosis* highlights an  
348 additional role that carceral systems may play in propagating infectious diseases both within highly-  
349 connected prison systems and across space.

350 The rapid rise in incarceration rates in many countries[31] and stark global disparities in  
351 tuberculosis incidence inside compared to outside prisons[8,9,13,32] suggests that spillover of infection  
352 may contribute to community TB transmission outside of Brazil. A study of multi-drug resistant (MDR)  
353 TB transmission found that up to 31% of MDR TB in the country of Georgia was directly or indirectly  
354 linked to prisons.[22] Our transmission inference framework is conservative in that it identifies a  
355 minimum contribution of spillover to total community transmission, and therefore, is consistent with  
356 these findings. The role of prisons and other detention centers as disease reservoirs is not unique to  
357 tuberculosis. Previous studies have identified spillover of meningococcal disease[33] and SARS-CoV-  
358 2[34] from prisons to the community. Prison transfers have also spread of SARS-CoV-2 across prisons in  
359 California, resulting in widespread outbreaks.[35]

360           The frequent spillover of infection from prisons to surrounding communities indicates that for TB  
361 control to be achieved in Central West Brazil, TB control efforts must focus on reducing the  
362 extraordinarily high transmission risk within prisons. Tuberculosis control programs should expand  
363 routine active screenings during[12,36] and following incarceration so that cases can be diagnosed early  
364 and linked to treatment. Individuals leaving prison are at heightened risk of tuberculosis and are a  
365 particularly vulnerable population. Preventive therapy is not provided in prisons in Brazil and many other  
366 low- and middle-income countries and could represent an effective means for tuberculosis prevention,  
367 particularly among individuals exiting prisons for community environments where the risk of reinfection  
368 is lower. More broadly, improving the unsanitary, inhumane conditions of incarceration and expanding  
369 access to primary healthcare and nutrition are critical.

370           Reducing this excess burden of disease will require work that extends beyond biomedical  
371 interventions. The most direct way to mitigate the excess tuberculosis risk created by prisons is for  
372 governments to rapidly reduce incarcerated populations, as advocated by the American Public Health  
373 Association, to reduce the broader harms associated with incarceration.[37] Prison releases have already  
374 begun as a means of reducing infectious disease transmission risk. [38] In an attempt to reduce the risk of  
375 COVID-19 in prisons, for example, Brazil released more than thirty thousand people by mid-2020.[39]

376           Our study has several limitations. First, our study highlights the uncertainty inherent in  
377 transmission inferences drawn from genomic surveillance data, which almost always constitutes an  
378 incomplete sample of population-wide infections. We addressed the incomplete sampling of *M.*  
379 *tuberculosis* genomes in two ways. First, we took a probabilistic transmission inference approach that  
380 accounts for uncertainty in transmission linkages and also includes unsampled individuals contributing to  
381 transmission.[21] Second, in order to collect the most comprehensive set of *M. tuberculosis* genomes  
382 possible, we combined isolates collected during active mass screening within prisons and passive routine  
383 surveillance in the community. The result was that isolates from prisons are overrepresented in our  
384 genomic collection. Because of the over-sampling within prisons, we could not directly quantify the  
385 contribution of transmission within prisons and spillover from prisons on overall recent infections in the

386 study area. However, by taking a probabilistic transmission inference approach that accounted for  
387 uncertainty in transmission linkages as well as unsampled individuals contributing to transmission, we  
388 were able to quantify the minimum number of reconstructed spillover events consistent with inferred  
389 transmission trees. Because we cannot infer the identity or incarceration history of unsampled people who  
390 contribute to transmission, our estimates of the contribution of spillover are conservative and likely  
391 underestimate the full impact of spillover on infections in the community. However, our finding of  
392 geographically widespread spillover occurring over several years suggests that spillover is common and  
393 an important contributor to population-wide *M. tuberculosis* transmission.

394 Additionally, transmission trees reflect information from timed *M. tuberculosis* phylogenies and  
395 epidemiological priors and it remains difficult to distinguish genomic sampling proportion from  
396 generation time and sampling time distributions. Because we conducted transmission inference in a  
397 tuberculosis-endemic setting, rather than in a discrete outbreak, our rate of genomic sampling was lower  
398 than in some previous tuberculosis transmission studies. To reduce uncertainty in sampling proportion,  
399 we conducted transmission inference on recent subtrees for which we had sampled a greater proportion of  
400 isolates. To investigate the influence of epidemiological priors on transmission inferences, we conducted  
401 a sensitivity analysis (Table E2) and found that our conclusions about transmission linkages were largely  
402 unchanged (Supplementary Text, Figs. S3-S4), although, as expected, the number of transmission events  
403 and thus spillover events was dependent on epidemiological priors (Figs. S5-S6).

404 Finally, we conducted whole genome sequencing of *M. tuberculosis* isolates cultured from  
405 sputum and generated single consensus genomes from each participant, excluding within-host diversity.  
406 We also employed an existing bioinformatic approach to identify *M. tuberculosis* variants and excluded  
407 repetitive genomic regions as is common practice.[23,40] Future studies that leverage within-host *M.*  
408 *tuberculosis* diversity and/or include the diverse PE/PPE genes could provide greater resolution and  
409 reduce the uncertainty of transmission inferences.[41]

410 In this study, we present genomic evidence that spillover of tuberculosis infection risk from  
411 prisons to surrounding communities is frequent in Central West Brazil. The dramatic expansion of



412 incarceration in recent decades has put an increasing population at extremely high risk of tuberculosis;  
413 this risk extends to surrounding communities. Reducing the excess tuberculosis transmission risk within  
414 prisons and other detention centers is therefore an urgent public health priority. Our findings additionally  
415 highlight the potential for pathogen genomic surveillance to be used to identify other key environments  
416 with a disproportionate role in pathogen transmission in order to prioritize public health interventions.

417

#### 418 **Acknowledgments**

419 We would like to acknowledge the contributions of AGEPEN, the Mato Grosso do Sul state criminal  
420 justice agency; LACEN, the state reference laboratory; and the Mato Grosso do Sul State Health  
421 Department. All authors had full access to all the data in the study and had final responsibility for the  
422 decision to submit.

423

424

425 **References**

426

- 427 1. The World Health Organization, World Health Organization. Global Tuberculosis Report  
428 2020. Geneva; 2020.
- 429 2. Churchyard G, Kim P, Shah NS, Rustomjee R, Gandhi N, Mathema B, et al. What We  
430 Know about Tuberculosis Transmission: An Overview. *J Infect Dis*. 2017;216: S629–  
431 S635. doi:10.1093/infdis/jix362
- 432 3. Auld SC, Sarita Shah N, Mathema B, Brown TS, Ismail N, Omar SV, et al. Extensively  
433 drug-resistant tuberculosis in South Africa: Genomic evidence supporting transmission in  
434 communities. *Eur Respir J*. 2018;52. doi:10.1183/13993003.00246-2018
- 435 4. Middelkoop K, Mathema B, Myer L, Shashkina E, Whitelaw A, Kaplan G, et al.  
436 Transmission of tuberculosis in a south African community with a high prevalence of HIV  
437 infection. *J Infect Dis*. 2015;211: 53–61. doi:10.1093/infdis/jiu403
- 438 5. Andrews JR, Morrow C, Walensky RP, Wood R. Integrating social contact and  
439 environmental data in evaluating tuberculosis transmission in a South African township. *J*  
440 *Infect Dis*. 2014;210: 597–603. doi:10.1093/infdis/jiu138
- 441 6. Yates TA, Khan PY, Knight GM, Taylor JG, McHugh TD, Lipman M, et al. The  
442 transmission of Mycobacterium tuberculosis in high burden settings. *Lancet Infect Dis*.  
443 2016;16: 227–238. doi:10.1016/S1473-3099(15)00499-5
- 444 7. Andrews JR, Morrow C, Wood R. Modeling the role of public transportation in sustaining  
445 tuberculosis transmission in South Africa. *Am J Epidemiol*. 2013;177: 556–561.  
446 doi:10.1093/aje/kws331
- 447 8. Dolan K, Wirtz AL, Moazen B, Ndeffo-mbah M, Galvani A, Kinner SA, et al. Global  
448 burden of HIV, viral hepatitis, and tuberculosis in prisoners and detainees. *Lancet*.  
449 2016;388: 1089–1102. doi:10.1016/S0140-6736(16)30466-4
- 450 9. Cords O, Martinez L, Warren JL, O’Marr JM, Walter KS, Cohen T, et al. Incidence and  
451 prevalence of tuberculosis in incarcerated populations: a systematic review and meta-  
452 analysis. *Lancet Public Heal*. 2021. doi:10.1016/S2468-2667(21)00025-6
- 453 10. Urrego J, Ko AI, Da Silva Santos Carbone A, Paião DSG, Sgarbi RVE, Yeckel CW, et al.  
454 The impact of ventilation and early diagnosis on tuberculosis transmission in Brazilian  
455 prisons. *Am J Trop Med Hyg*. 2015;93: 739–746. doi:10.4269/ajtmh.15-0166
- 456 11. Basu S, Stuckler D, McKee M. Addressing institutional amplifiers in the dynamics and  
457 control of tuberculosis epidemics. *Am J Trop Med Hyg*. 2011;84: 30–37.  
458 doi:10.4269/ajtmh.2011.10-0472
- 459 12. Mabud TS, de Lourdes Delgado Alves M, Ko AI, Basu S, Walter KS, Cohen T, et al.  
460 Evaluating strategies for control of tuberculosis in prisons and prevention of spillover into  
461 communities: An observational and modeling study from Brazil. Metcalfe JZ, editor.  
462 *PLoS Med*. 2019;16: e1002737. doi:10.1371/journal.pmed.1002737
- 463 13. Baussano I, Williams BG, Nunn P, Beggiato M, Fedeli U, Scano F. Tuberculosis  
464 incidence in prisons: A systematic review. *PLoS Med*. 2010;7: 1–10.  
465 doi:10.1371/journal.pmed.1000381
- 466 14. Walter KS, Martinez L, Arakaki-Sanchez D, Sequera VG, Estigarribia Sanabria G, Cohen  
467 T, et al. The escalating tuberculosis crisis in central and South American prisons. *Lancet*.  
468 2021 [cited 10 Apr 2021]. doi:10.1016/s0140-6736(20)32578-2
- 469 15. Sacchi FPC, Praça RM, Tatará MB, Simonsen V, Ferrazoli L, Croda MG, et al. Prisons as  
470 reservoir for community transmission of tuberculosis, Brazil. *Emerg Infect Dis*. 2015;21:

- 471 452–455. doi:10.3201/eid2103.140896
- 472 16. Coker R, McKee M, Atun R, Dimitrova B, Dodonova E, Kuznetsov S, et al. Risk factors  
473 for pulmonary tuberculosis in Russia: Case-control study. *Br Med J*. 2006;332: 85–87.  
474 doi:10.1136/bmj.38684.687940.80
- 475 17. Warren JL, Grandjean L, Moore DAJ, Lithgow A, Coronel J, Sheen P, et al. Investigating  
476 spillover of multidrug-resistant tuberculosis from a prison: a spatial and molecular  
477 epidemiological analysis. *BMC Med*. 2018;16: 122. doi:10.1186/s12916-018-1111-x
- 478 18. Jenkins HE, Plesca V, Ciobanu A, Crudu V, Galusca I, Soltan V, et al. Assessing spatial  
479 heterogeneity of multidrug-resistant tuberculosis in a high-burden country. *Eur Respir J*.  
480 2013;42: 1291–1301. doi:10.1183/09031936.00111812
- 481 19. Séraphin MN, Didelot X, Nolan DJ, May JR, Khan MSR, Murray ER, et al. Genomic  
482 investigation of a *Mycobacterium tuberculosis* outbreak involving prison and community  
483 cases in Florida, United States. *Am J Trop Med Hyg*. 2018;99: 867–874.  
484 doi:10.4269/ajtmh.17-0700
- 485 20. Jones TF, Woodley CL, Fountain FF, Schaffner W. Increased incidence of the outbreak  
486 strain of *Mycobacterium tuberculosis* in the surrounding community after an outbreak in a  
487 jail. (Original Article). *South Med J*. 2003;96: 155–158. Available:  
488 [https://go.gale.com/ps/i.do?p=AONE&sw=w&issn=00384348&v=2.1&it=r&id=GALE%](https://go.gale.com/ps/i.do?p=AONE&sw=w&issn=00384348&v=2.1&it=r&id=GALE%7CA98828112&sid=googleScholar&linkaccess=fulltext)  
489 [7CA98828112&sid=googleScholar&linkaccess=fulltext](https://go.gale.com/ps/i.do?p=AONE&sw=w&issn=00384348&v=2.1&it=r&id=GALE%7CA98828112&sid=googleScholar&linkaccess=fulltext)
- 490 21. Didelot X, Fraser C, Gardy J, Colijn C, Malik H. Genomic infectious disease  
491 epidemiology in partially sampled and ongoing outbreaks. *Mol Biol Evol*. 2017;34: 997–  
492 1007. doi:10.1093/molbev/msw275
- 493 22. Gygli SM, Loiseau C, Jugheli L, Adamia N, Trauner A, Reinhard M, et al. Prisons as  
494 ecological drivers of fitness-compensated multidrug-resistant *Mycobacterium*  
495 tuberculosis. *Nat Med* 2021 277. 2021;27: 1171–1177. doi:10.1038/s41591-021-01358-x
- 496 23. Menardo F, Duchêne S, Brites D, Gagneux S. The molecular clock of mycobacterium  
497 tuberculosis. *PLoS Pathog*. 2019;15. doi:10.1371/journal.ppat.1008067
- 498 24. Kozlov AM, Darriba D, Flouri T, Morel B, Stamatakis A. RAxML-NG: A fast, scalable,  
499 and user-friendly tool for maximum likelihood phylogenetic inference. Wren J, editor.  
500 *Bioinformatics*. 2019 [cited 13 May 2019]. doi:10.1093/bioinformatics/btz305
- 501 25. Bouckaert R, Vaughan TG, Barido-Sottani J, Duchêne S, Fourment M, Gavryushkina A,  
502 et al. BEAST 2.5: An advanced software platform for Bayesian evolutionary analysis.  
503 *PLoS Comput Biol*. 2019;15: e1006650. doi:10.1371/journal.pcbi.1006650
- 504 26. World Health Organization. Global tuberculosis report 2020. Geneva; 2020.
- 505 27. Holt KE, Mcadam P, Vuong P, Thai K, Thuy N, Thuong T, et al. Frequent transmission of  
506 the *Mycobacterium tuberculosis* Beijing lineage and positive selection for the EsxW  
507 Beijing variant in Vietnam. *Nat Genet*. 2018. doi:10.1038/s41588-018-0117-9
- 508 28. Fritz SA, Purvis A. Selectivity in mammalian extinction risk and threat types: A new  
509 measure of phylogenetic signal strength in binary traits. *Conserv Biol*. 2010;24: 1042–  
510 1051. doi:10.1111/j.1523-1739.2010.01455.x
- 511 29. Walker TM, Kohl TA, Omar S V., Hedge J, Del Ojo Elias C, Bradley P, et al. Whole-  
512 genome sequencing for prediction of *Mycobacterium tuberculosis* drug susceptibility and  
513 resistance: A retrospective cohort study. *Lancet Infect Dis*. 2015;15: 1193–1202.  
514 doi:10.1016/S1473-3099(15)00062-6
- 515 30. Walker TM, Ip CLC, Harrell RH, Evans JT, Kapatai G, Dedicoat MJ, et al. Whole-  
516 genome sequencing to delineate *Mycobacterium tuberculosis* outbreaks: A retrospective

- 517 observational study. *Lancet Infect Dis.* 2013;13: 137–146. doi:10.1016/S1473-  
518 3099(12)70277-3
- 519 31. Walmsley R. World Prison Population List (twelfth edition). Inst Crim Policy Res. 2018.  
520 Available: [www.prisonstudies.org](http://www.prisonstudies.org)
- 521 32. Walter K, Martinez L, Arakaki-Sanchez D, Sequera V, G ES, T C, et al. The escalating  
522 tuberculosis crisis in Central and South American prisons. *Lancet.*
- 523 33. Tappero JW, Reporter R, Wenger JD, Ward BA, Reeves MW, Missbach TS, et al.  
524 Meningococcal Disease in Los Angeles County, California, and among Men in the County  
525 Jails. *N Engl J Med.* 1996;335: 833–841. doi:10.1056/nejm199609193351201
- 526 34. Reinhart E, Chen DL. Incarceration and its disseminations: COVID-19 pandemic lessons  
527 from Chicago’s cook county jail. *Health Aff.* 2020;39: 1412–1418.  
528 doi:10.1377/hlthaff.2020.00652
- 529 35. Sandra McCoy, Stefano M. Bertozze, David Sears, Catherine Duarte, Drew Cameron,  
530 Brie Williams. Urgent Memo: COVID-19 Outbreak: San Quentin Prison. San Francisco,  
531 CA; 2020. Available: [https://www.documentcloud.org/documents/6956448-06-15-20-San-](https://www.documentcloud.org/documents/6956448-06-15-20-San-Quentin-Urgent-Memo.html)  
532 [Quentin-Urgent-Memo.html](https://www.documentcloud.org/documents/6956448-06-15-20-San-Quentin-Urgent-Memo.html)
- 533 36. Santos A da S, Oliveira RD de, Lemos EF, Lima F, Cohen T, Cords O, et al. Yield,  
534 Efficiency and Costs of Mass Screening Algorithms for Tuberculosis in Brazilian Prisons.  
535 *Clin Infect Dis.* 2020 [cited 3 Apr 2020]. doi:10.1093/cid/ciaa135
- 536 37. American Public Health Association. Advancing Public Health Interventions to Address  
537 the Harms of the Carceral System. 2021. Available: [https://www.apha.org/policies-and-](https://www.apha.org/policies-and-advocacy/public-health-policy-statements/policy-database/2021/01/14/advancing-public-health-interventions-to-address-the-harms-of-the-carceral-system)  
538 [advocacy/public-health-policy-statements/policy-database/2021/01/14/advancing-public-](https://www.apha.org/policies-and-advocacy/public-health-policy-statements/policy-database/2021/01/14/advancing-public-health-interventions-to-address-the-harms-of-the-carceral-system)  
539 [health-interventions-to-address-the-harms-of-the-carceral-system](https://www.apha.org/policies-and-advocacy/public-health-policy-statements/policy-database/2021/01/14/advancing-public-health-interventions-to-address-the-harms-of-the-carceral-system)
- 540 38. Wang EA, Western B, Berwick DM. COVID-19, Decarceration, and the Role of  
541 Clinicians, Health Systems, and Payers: A Report From the National Academy of  
542 Sciences, Engineering, and Medicine. *Jama.* 2020;06511. doi:10.1001/jama.2020.22109
- 543 39. De Oliveira Andrade R. Covid-19: Prisons exposed in Brazil’s crisis. *The BMJ.* 2020.  
544 doi:10.1136/bmj.m2884
- 545 40. Meehan CJ, Goig GA, Kohl TA, Verboven L, Dippenaar A, Ezewudo M, et al. Whole  
546 genome sequencing of *Mycobacterium tuberculosis*: current standards and open issues.  
547 *Nat Rev Microbiol.* 2019;17: 533–545. doi:10.1038/s41579-019-0214-5
- 548 41. Walter KS, Colijn C, Cohen T, Mathema B, Liu Q, Bowers J, et al. Genomic variant-  
549 identification methods may alter mycobacterium tuberculosis transmission inferences.  
550 *Microb Genomics.* 2020;6: 1–16. doi:10.1099/mgen.0.000418  
551

**a**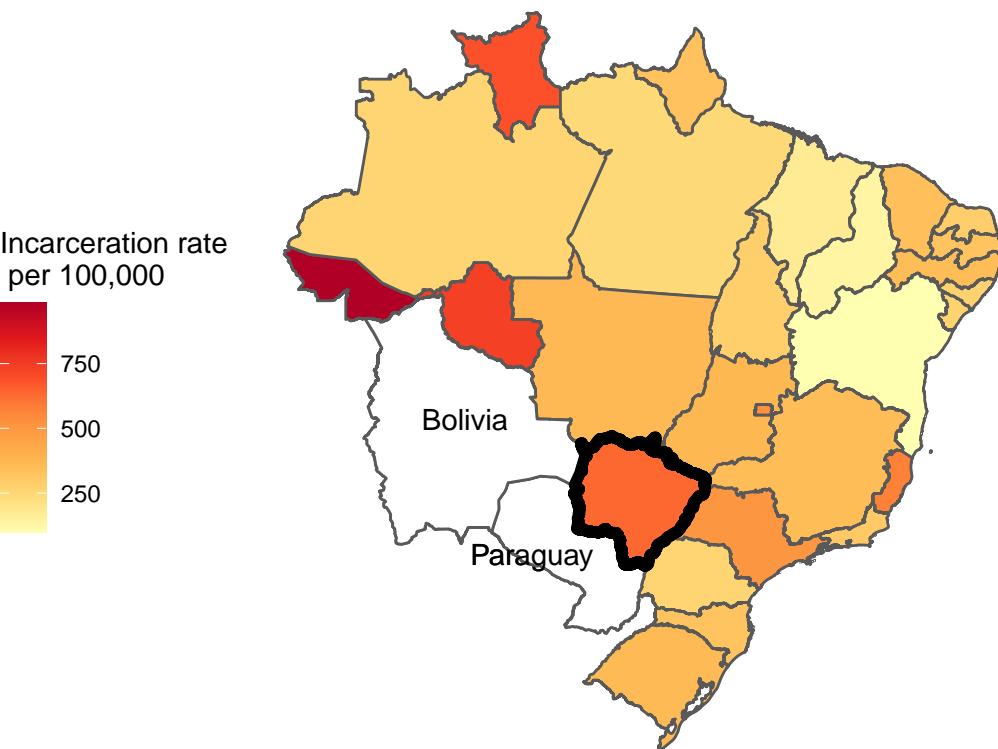**b**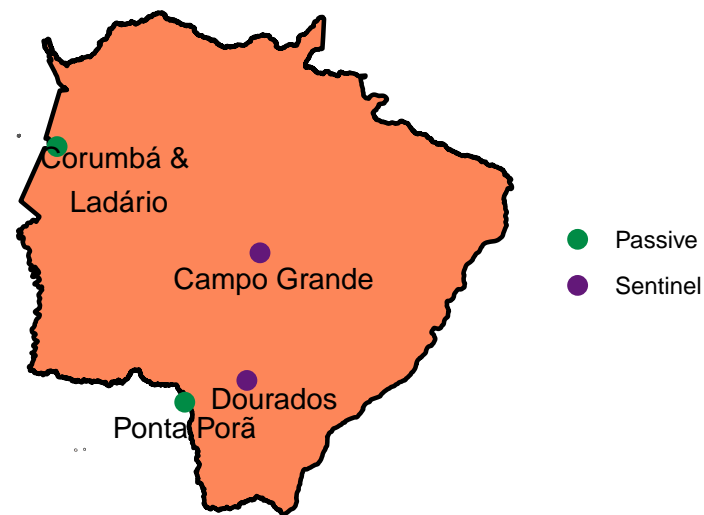

Incarceration status — Community — Incarcerated

**c**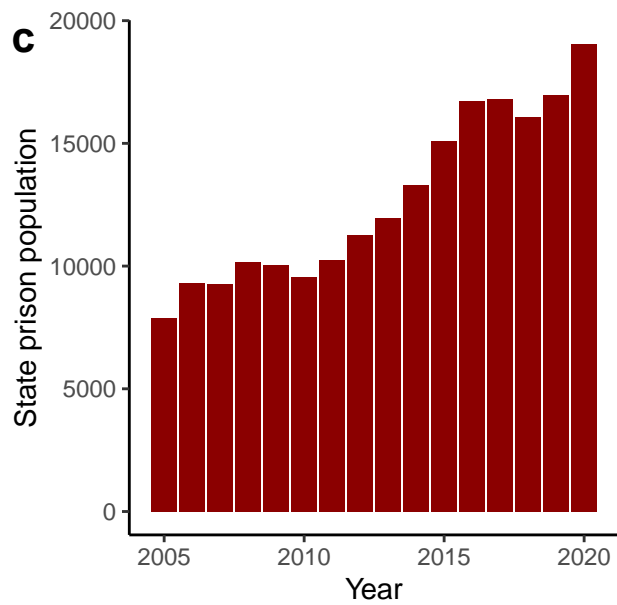**d**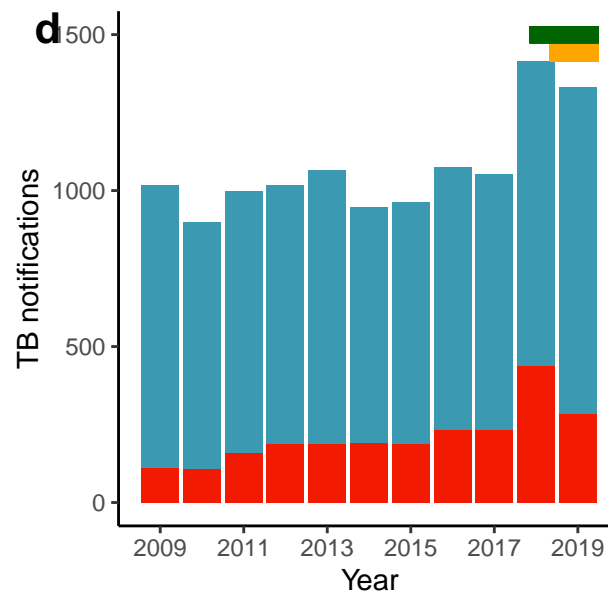**e**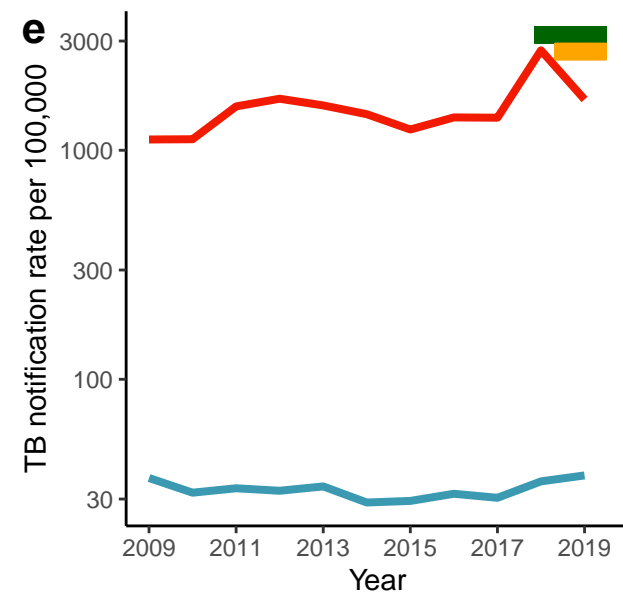

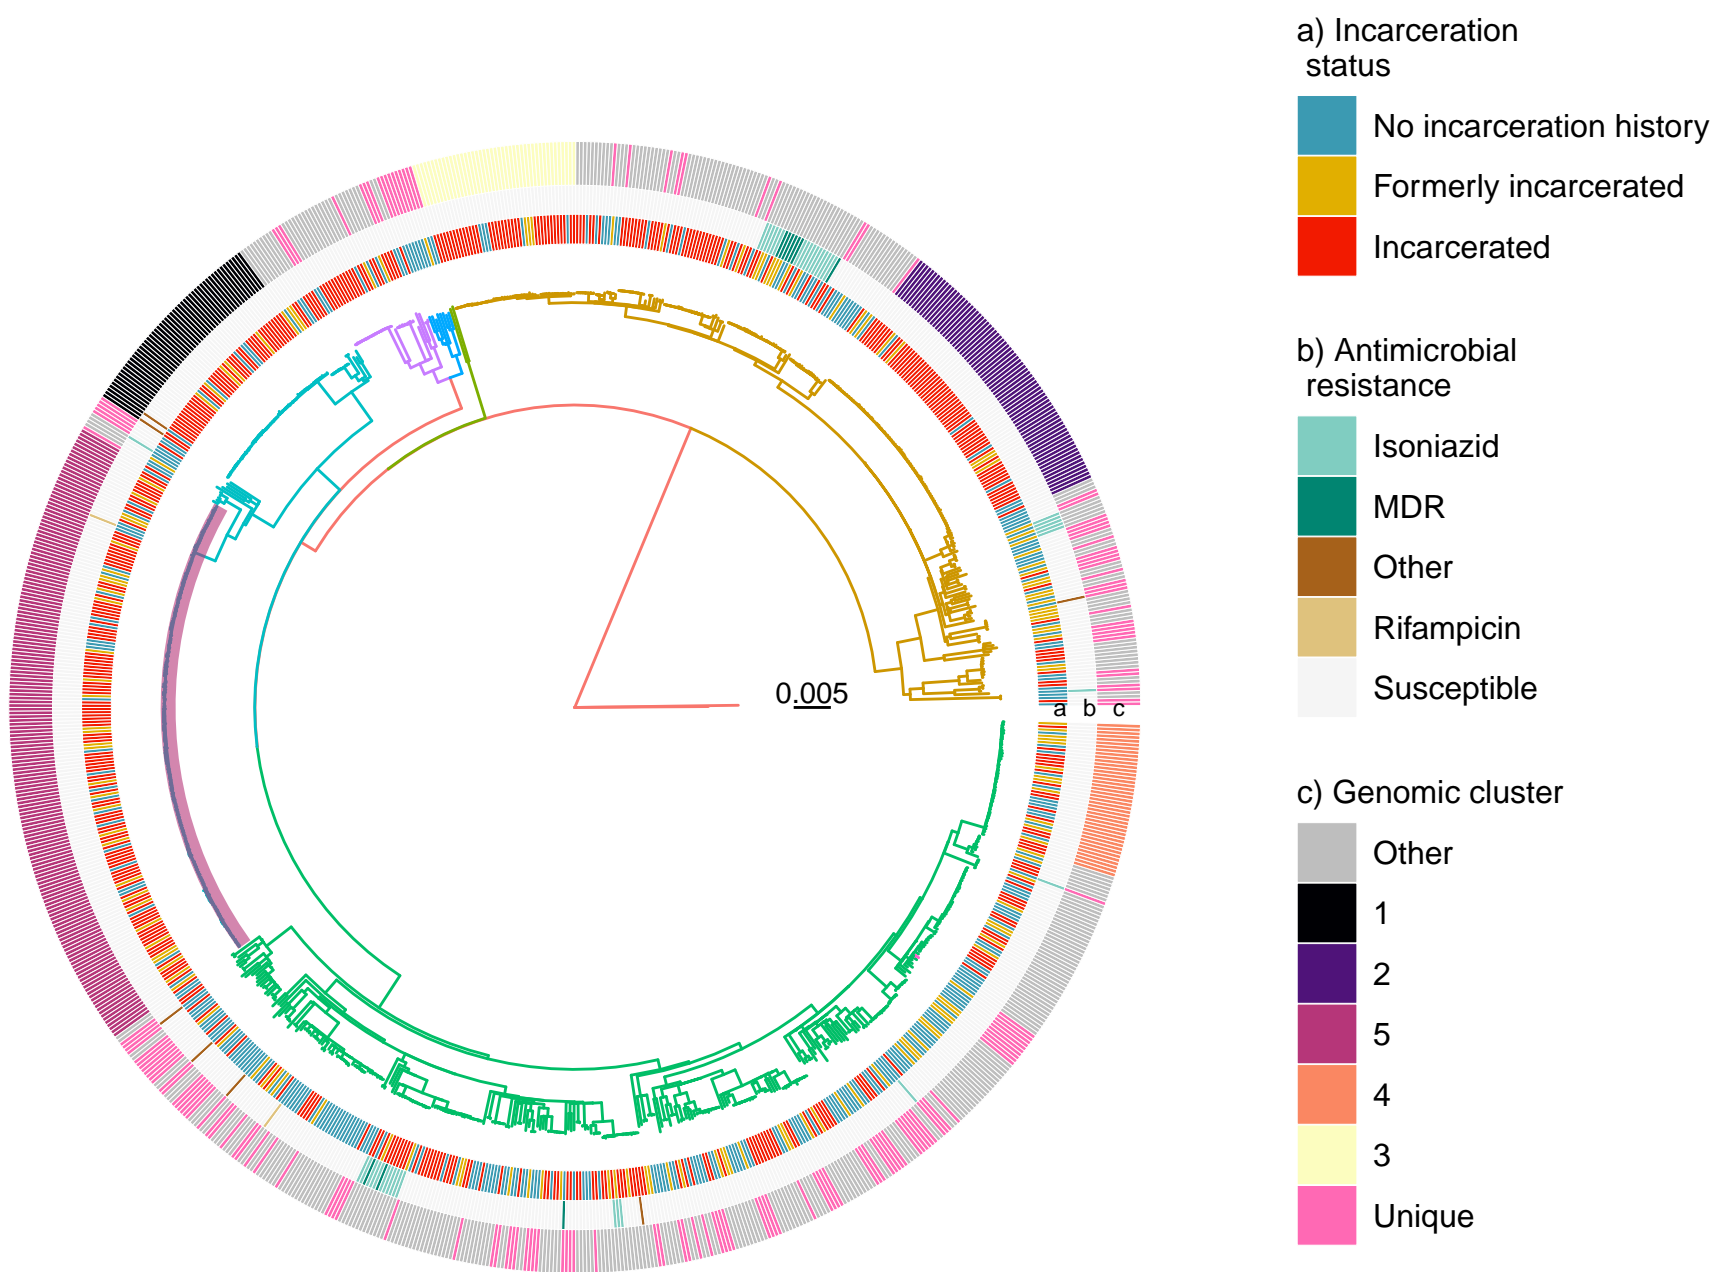

Lineage

|       |       |       |       |
|-------|-------|-------|-------|
| — 4.1 | — 4.3 | — 4.7 | — 4.9 |
| — 4.2 | — 4.4 | — 4.8 |       |

a

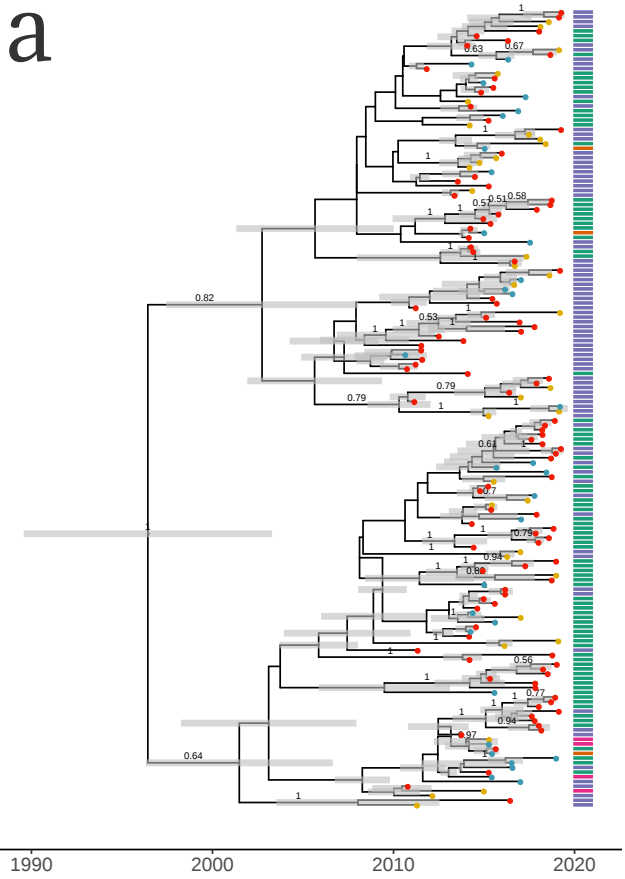

Incarceration status

- Formerly incarcerated
- Incarcerated
- No incarceration history

City

- Campo Grande
- Corumba/ Ladario
- Dourados
- Ponta Pora

b

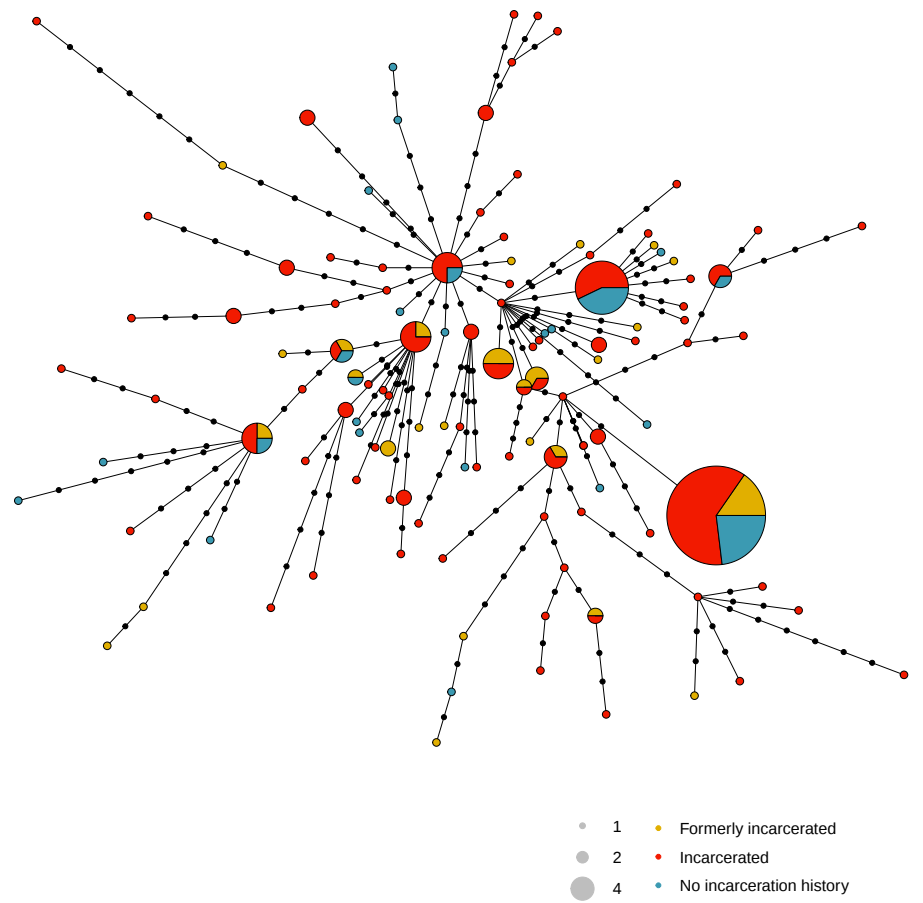

**a**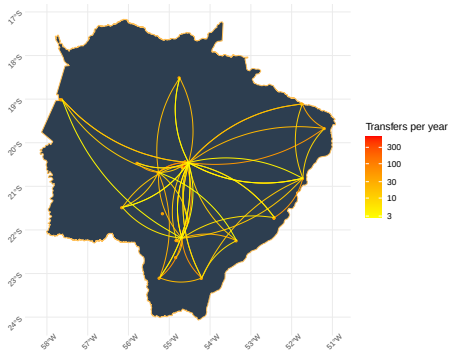**b**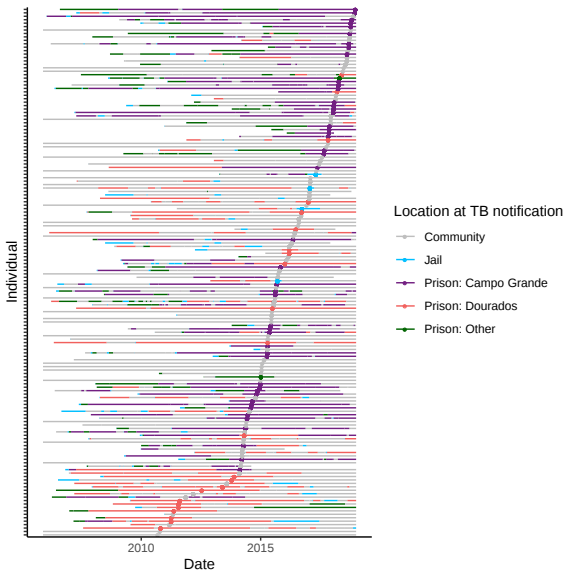

Source: http://medrxiv.org/content/10.1101/2021.06.22.21259360v2.full.pdf
