1 **Title**

2 Genomic evidence for prisons as amplifiers of community tuberculosis epidemics

3 Short title: Prison amplifiers of tuberculosis epidemics

4 **Authors**

5 Katharine S. Walter PhD<sup>1\*</sup>, Paulo César Pereira dos Santos BS<sup>2</sup>, Thais Oliveira Gonçalves  
6 BS<sup>3</sup>, Brunna Oliveira da Silva BS<sup>2</sup>, Andrea da Silva Santos PhD<sup>2</sup>, Alessandra de Cássia Leite  
7 MSc<sup>2</sup>, Alessandra Moura da Silva BA<sup>4</sup>, Flora Martinez Figueira Moreira MSc<sup>2</sup>, Roberto Dias de  
8 Oliveira PhD<sup>5</sup>, Everton Ferreira Lemos PhD<sup>4</sup>, Eunice Cunha PhD<sup>3</sup>, Yiran E. Liu BS<sup>1,6</sup>, Albert Ko  
9 MD<sup>7</sup>, Caroline Colijn PhD<sup>8</sup>, Ted Cohen MD<sup>7</sup>, Barun Mathema PhD<sup>9</sup>, Julio Croda MD<sup>4,7,10</sup>†, Jason  
10 R. Andrews MD<sup>1</sup>†

11 †These authors contributed equally to this work.

12 \*Corresponding author. Email: [kwalter@stanford.edu](mailto:kwalter@stanford.edu)

13  
14 **Affiliations**

15 <sup>1</sup>Division of Infectious Diseases and Geographic Medicine, Stanford University School of  
16 Medicine; Stanford, United States.

17 <sup>2</sup> Health Sciences Research Laboratory, Federal University of Grande Dourados; Dourados,  
18 Brazil.

19 <sup>3</sup> Laboratory of Bacteriology, Central Laboratory of Mato Grosso do Sul; Campo Grande, Brazil.

20 <sup>4</sup> School of Medicine, Federal University of Mato Grosso do Sul, School of Medicine; Campo  
21 Grande, Brazil.

22 <sup>5</sup> Nursing Course, State University of Mato Grosso do Sul; Dourados, Brazil.

23 <sup>6</sup>Cancer Biology Graduate Program, Stanford University School of Medicine; Stanford, United  
24 States.

25 <sup>7</sup>Department of Epidemiology of Microbial Diseases, Yale School of Public Health; New Haven,  
26 United States.

27 <sup>8</sup>Department of Mathematics, Simon Fraser University; Burnaby, Canada.

28 <sup>9</sup>Department of Epidemiology, Columbia University Mailman School of Public Health; New  
29 York, United States.

30 <sup>10</sup> Mato Grosso do Sul Office, Oswaldo Cruz Foundation; Campo Grande, Brazil.

31

## 32 **Abstract**

33 Prisons are high-incidence settings for tuberculosis around the world, yet the contribution of  
34 spillover from prisons in driving community epidemics has not been quantified. *We* whole  
35 genome sequenced 1,152 *M. tuberculosis* isolates from participants diagnosed with tuberculosis  
36 within prisons and in the community in *Mato Grosso do Sul, Brazil from 2014 to 2019*. By  
37 integrating timed phylogenies and detailed location data, we reconstructed probabilistic  
38 transmission histories. *M. tuberculosis* sequences from incarcerated and non-incarcerated people  
39 were closely phylogenetically related. We found that 57% of recent community-wide tuberculosis  
40 cases were attributable to transmission from individuals with an incarceration history, 2.6% of the  
41 population. Further, we find genomic evidence that the prison system disseminates *M.*  
42 *tuberculosis* genotypes through frequent transfers across the state. This population-wide genomic  
43 transmission reconstruction framework can be applied to identify key environments amplifying  
44 infectious disease transmission to prioritize public health interventions.

## 45 **Teaser**

46 Prison spillover plays an outsized role in community tuberculosis transmission.

## 47 **MAIN TEXT**

### 48 **Introduction**

49 Tuberculosis remains one of the leading causes of death by an infectious disease and led to  
50 1.4 million deaths in 2019.(1) Locating where *M. tuberculosis* transmission occurs is critical for  
51 public health interventions, yet in high-incidence settings, where most tuberculosis is transmitted  
52 remains unknown.(1–6) Prisons, hospitals, or mines are known to be high-risk environments(7–9)  
53 and may have epidemiological impacts that transcend their walls, serving as institutional  
54 amplifiers of infection.(10, 11) Identifying institutional amplifiers of tuberculosis is of particular  
55 concern in Central and South America, where the incarcerated population has increased by over

56 200% since 2000 and 11% percent of tuberculosis cases now occur among incarcerated people,  
57 who comprise <1% of the total population.(12)

58 The full impact of increasing incarceration rates on the tuberculosis epidemic in the  
59 Americas and elsewhere has been difficult to quantify. Many people are infected in prison, but  
60 only diagnosed later.(11, 13, 14) Further, spillover may occur when incarcerated people, prison  
61 staff, or visitors are infected within high-incidence prison environments and transmit *M.*  
62 *tuberculosis* onwards in communities outside prison. Previous studies have found that the excess  
63 risk of tuberculosis within prisons extends to surrounding communities(15, 16) and that *M.*  
64 *tuberculosis* genotypes responsible for jail and prison outbreaks are also found in the surrounding  
65 communities.(13, 15, 17, 18)

66 Pathogen genomes can be powerfully harnessed to infer high-resolution transmission  
67 histories, including who-infected-whom.(19) However, studies have not yet combined *M.*  
68 *tuberculosis* genomic and epidemiologic data to reconstruct transmission linkages between  
69 potential institutional amplifiers and the community, nor have they estimated the fraction of  
70 community transmission attributable to such spillover. To quantify the role of prisons in  
71 population-wide tuberculosis transmission, we conducted prospective genomic surveillance for  
72 tuberculosis in the Brazilian state of Mato Grosso do Sul and used full *M. tuberculosis* genomes,  
73 combined with detailed meta-data on incarceration history, to reconstruct tuberculosis  
74 transmission chains spanning prisons and the community.

75

## 76 **Results**

### 77 **Tuberculosis and incarceration trends in Mato Grosso do Sul**

78 Brazil's incarcerated population grew by 107% (from 361,402 to 748,009) from 2005 to  
79 2019, an increase closely paralleled in the Central West state of Mato Grosso do Sul, where the  
80 incarcerated population has grown by 115% (7,891 to 16,976) over the same period (Fig. 1a-c). In

81 2019, prisons in the state were at 203% occupancy. While the state's notification rate of new and  
82 retreatment tuberculosis in the general population (38 per 100,000) is similar to Brazil's national  
83 tuberculosis notification rate (40 per 100,000) in 2019,(20) the notification rate within prisons  
84 was 43 times as high (1,666 per 100,000), again similar to Brazil's national notification rate  
85 within prisons (1,596 per 100,000) in 2019 (Fig. 1d,e).

### 86 **Population-based genomic surveillance across Mato Grosso do Sul state**

87 From 2014 to 2019, 3,491 new and retreatment cases of tuberculosis were reported in the  
88 Campo Grande and Dourados, the two largest cities in Mato Grosso do Sul, Brazil. Of these,  
89 1,249 had positive cultures and we sequenced 787 *M. tuberculosis* isolates. We sequenced  
90 additional isolates from three other cities in the state and from earlier years in Dourados for a total  
91 of 1,090 isolates from unique tuberculosis notifications (Fig. 1b). Whole genome sequences  
92 (WGS) for 1,043 isolates met our coverage and quality criteria (Methods). We excluded 10%  
93 (108/1043) of isolates with mixed infection, resulting in 935 high-quality genomes from 935  
94 unique tuberculosis episodes from 918 individuals.

95 Of the 935 isolates in our analyses, 50% (465/935) were incarcerated; 16% (150/935)  
96 were from patients who were formerly incarcerated; and 34% (320/935) of the study population  
97 did not have an incarceration history at the time of tuberculosis notification. Among those who  
98 did not have an incarceration history, 32 people reported contact with incarcerated individuals.  
99 Additional population characteristics are in Table S1. Isolates were largely from *M. tuberculosis*  
100 lineage 4 and predominantly fell into three sublineages: lineage 4.1, 4.3, and 4.4 (Fig. 2). Overall,  
101 we found a low prevalence of antibiotic resistance across isolates, with 93.7% of isolates  
102 susceptible to all antibiotics (Fig. 2).

### 103 **Phylogenetic structure of *M. tuberculosis* from prisons and the community**

104 A maximum likelihood phylogeny (Fig. 2) demonstrates that *M. tuberculosis* isolates  
105 sampled from incarcerated and non-incarcerated people do not form distinct clades and are

106 closely phylogenetically related. Terminal branch lengths, a proxy for the degree of recent  
107 transmission,(21) are significantly longer for isolates from people with no incarceration history at  
108 the time of tuberculosis notification ( $9.4 \times 10^{-4}$  substitutions/site) than isolates from incarcerated  
109 individuals ( $2.2 \times 10^{-4}$ ; two-sample t-test p-value =  $1.14 \times 10^{-7}$ ) or formerly incarcerated  
110 individuals ( $3.8 \times 10^{-4}$ ;  $p = 1.6 \times 10^{-4}$ ), suggesting that individuals with an incarceration history  
111 were more likely to be recently infected (Fig. S1).

## 112 **Genetic clustering of *M. tuberculosis* from prisons and the community**

113 To identify potential clusters of recent transmission, we applied a commonly used 12-SNP  
114 threshold,(22) including all isolates within the threshold distance of at least one other clustered  
115 isolate. Eighty-three percent (777/935) of the isolates fell into 84 genomic clusters (each  
116 including 2 to 170 isolates), providing evidence that notifications were largely attributable to  
117 recent, local transmission rather than travel-associated importation or re-activation of genetically  
118 distinct latent infections (Fig. 2). Isolates from incarcerated people were more frequently  
119 clustered (93.3%, 434/465), than those from formerly incarcerated (86.0%, 129/150;  $p < 0.0001$ ),  
120 or never incarcerated people (66.9%, 214/320;  $p < 0.0001$ ), again suggesting more recent  
121 transmission within prisons.

122 We predicted that if prison and community-associated epidemics were distinct, isolates  
123 from the community would be most closely related to and cluster with other isolates from the  
124 community and vice versa. Of the 46 clusters with three or more isolates, including 703  
125 participants, 40 included isolates from community members who had no reported incarceration  
126 history. Of those potential transmission clusters, 85.0% (34/40) included isolates from people who  
127 were currently or previously incarcerated.

128 We found a similar pattern of clustering of isolates from community members and  
129 individuals with an incarceration history when using an alternative 5-SNP threshold for genomic  
130 clustering(23). With this threshold, of the 80 clusters with three or more isolates, 56 included

131 isolates from people with no incarceration history and 78.6% (44/56) also included isolates from  
132 people with an incarceration history.

### 133 ***A M. tuberculosis* clone spans prisons and the community across the state**

134 The largest potential transmission cluster, including 170 isolates sampled from September  
135 2010 to April 2019, was distributed across the state, including cases found across state's two  
136 largest cities, Campo Grande and Dourados, as well as the smaller cities Corumbá (on the  
137 Bolivian border) and Ponta Porã (on the Paraguayan border) (Fig. 1b, Fig. 3a). The cluster had a  
138 most recent common ancestor in 1996 (95% HPD: 1989-2003; Fig. 3a), indicating that the drug-  
139 susceptible clone had circulated for approximately 23 years before the most recent samples were  
140 collected. 103 isolates were from people incarcerated at the time of diagnosis, 35 from people  
141 formerly incarcerated, and 32 from people with no incarceration history at the time of tuberculosis  
142 notification.

143 As observed in other clusters, isolates from people who are currently and formerly  
144 incarcerated were closely genetically related—and often, identical—to isolates from people who  
145 were not incarcerated at the time of notification, suggesting they are linked through recent  
146 transmission (Fig. 3b).

147 We hypothesized that the criminal justice system's frequent transfer of people between  
148 prisons and jails could disseminate TB across the state. Brazil's national criminal law defines  
149 different "regimes" or stages of incarceration(30), which may facilitate the potential for spillover  
150 and dissemination of infection. People are incarcerated under closed regimes, within prisons;  
151 semi-open regimes, in which people may work outside prisons and return at night; and open  
152 regimes, under which people serve sentences outside of prison, but are required to make periodic  
153 court appearances.(30) We analyzed movements in the state's incarceration database and found  
154 that the average duration of incarceration was 230 days in a prison and 25 days in a jail. The  
155 incarceration database documents 7,982 mean yearly transfers between prisons (including closed

156 and semi-open prisons) from 2015-2018 in a prison population of 17,221 in August 2018,  
157 including frequent transfers between cities across the state (Fig. 4a).

158 To investigate the role of the criminal justice system in disseminating infection, we  
159 tracked the spread of the largest sampled *M. tuberculosis* cluster (Fig. 3) across prisons in Mato  
160 Grosso do Sul (Fig. 4b). From early 2011 to 2014, sampled isolates from the cluster were  
161 concentrated in the maximum security prison in Dourados, after which it was identified within  
162 two prisons in Campo Grande and then exported to prisons and jails in other cities. The cluster  
163 was not contained within the state's prison network; notified tuberculosis cases among  
164 community members outside of prison occurred over the duration of the clusters' state-wide  
165 spread.

#### 166 **Transmission trees reveal who-infected-whom, where, and when transmission occurred**

167 We further investigated genomic clusters by integrating timed phylogenies with  
168 epidemiological information to infer transmission trees, allowing us to reconstruct not only  
169 transmission linkages of who-infected-whom, but also locate when and where transmission  
170 occurred. Reconstructed transmission linkages revealed frequent transmission within prisons and  
171 spillover from prisons to the community. For example, we inferred likely transmission (89%  
172 posterior probability) between two individuals (Fig. 5a,b) and occurred between July 2014 and  
173 July 2015 with 94% posterior probability (Fig. 5c). Both the recipient and predicted infector were  
174 incarcerated in the same prison in Campo Grande at the time of the recipient's tuberculosis  
175 notification and that transmission occurred within this prison with a posterior probability of 97%.

#### 176 **Spillover from prisons plays a disproportionate role in community transmission**

177 To estimate the total contribution of different populations to community-wide tuberculosis  
178 transmission, we inferred transmission trees for all clustered isolates. We identified the location of  
179 both the infector and recipient over the distribution of likely infection times, allowing us to  
180 determine location-specific transmission probabilities. Finally, we summed transmission



181 probabilities over all potential transmission pairs by the incarceration status of both the infector  
182 and recipient at the time of transmission, giving a population-wide WAIFW matrix (Fig. 5d).  
183 Because we conducted active surveillance inside prisons and not in the general population, we  
184 corrected pairwise transmission probabilities to account for higher genomic sampling proportion  
185 of incarcerated populations (Fig. S2, Methods).

186 The population-wide WAIFW matrix reveals that a small proportion of the state's  
187 population, 0.84% (22,706 incarcerated people of a total population of 2,713,147 in 2017), were  
188 associated with 18% of observed transmissions to people with no incarceration history (Fig. 5d).  
189 When additionally including people who were previously incarcerated, 2.6% of the population  
190 (71,703 of 2,713,147) were associated with 39% of the transmission to people with no  
191 incarceration history (Fig. 5d), demonstrating the outsized impact of prisons on tuberculosis  
192 transmission in the state. In total, we found that 57% of all infections captured in our study  
193 (including incarcerated, formerly incarcerated and never incarcerated individuals), including 46%  
194 of infections in the community (among formerly incarcerated and never incarcerated individuals),  
195 were attributable to transmission from incarcerated or formerly incarcerated individuals, who  
196 comprise a small fraction of the state's population.

### 197 **Transmission inferences are robust to epidemiological priors**

198 We conducted a sensitivity analysis to determine the effect of epidemiological priors  
199 (Table S2) on transmission inferences for the largest genomic cluster (170 isolates). Transmission  
200 probabilities inferred for pairs of individuals were closely correlated across generation time priors  
201 (Pearson's  $r$ : 0.94 – 0.98, Fig. S3) and sampling time priors (Pearson's  $r$ : 0.84 – 0.98, Fig. S4),  
202 although the total number of observed transmission events was strongly influenced by both priors  
203 (Figure S5). This suggests that, as expected, epidemiological priors impact the magnitude of  
204 inferred transmission probabilities rather than the identity of predicted transmission pairs. Further,  
205 alternative priors did not strongly influence the population-wide WAIWF matrix for the largest

206 genomic cluster (Fig. S6). The fraction of transmission to those with no incarceration history  
207 attributable to spillover (from infectors who are currently or previously incarcerated) in the largest  
208 cluster ranges from 63.5% (medium sampling and generation times) to 72.3% (short generation  
209 time and long sampling time).

210

## 211 **Discussion**

212 Here, we find genomic evidence that spillover from a key, high-risk environment can  
213 drive tuberculosis transmission risk in the broader population. Controlling tuberculosis thus  
214 urgently requires reducing risk created by institutional amplifiers, which have outsized effects on  
215 the general population.<sup>(11)</sup> Our population-level transmission reconstruction framework can be  
216 applied to identify other high-risk environments or populations and quantify their contribution to  
217 community tuberculosis transmission, informing targeted public health interventions.<sup>(11)</sup>

218 The disproportionate role that prisons play in driving community tuberculosis  
219 transmission is not unique to Brazil. Incidence of tuberculosis in prisons is extremely high  
220 globally.<sup>(7, 8)</sup> The rapid growth in incarceration rates across Central and South America, in  
221 particular, puts an increasing population at heightened risk of tuberculosis—risk that we have  
222 found can extend into neighboring communities. Although the prevalence of antibiotic resistance  
223 is low in Central West, Brazil, prisons have also amplified drug-resistant tuberculosis in  
224 Russia<sup>(24)</sup> and elsewhere. Further, the role of prisons and other detention centers as disease  
225 reservoirs is not unique to tuberculosis. Previous studies have identified spillover of  
226 meningococcal disease<sup>(25)</sup> and SARS-CoV-2<sup>(26)</sup> from prisons to the community.

227 Our results emphasize that reducing the extraordinarily high transmission risk created by  
228 prison environments is an urgent priority. Public health programs need to work to reduce the  
229 extreme overcrowding within prisons; improve the unsanitary, often inhumane conditions of  
230 incarceration; and expand access to primary healthcare and nutrition. Tuberculosis control

231 programs should expand routine active screenings during(11, 27) and following incarceration so  
232 that cases can be diagnosed early and linked to treatment. Individuals leaving prison are at  
233 heightened risk of tuberculosis and may be a particularly vulnerable population. Further,  
234 preliminary evidence suggests that isoniazid protective therapy is protective against tuberculosis  
235 infection and should be considered as a protective intervention in high-risk prison  
236 environments.(28)

237 Reducing this excess burden of disease will require work that extends beyond biomedical  
238 interventions. The most direct way to mitigate the excess tuberculosis risk created by prisons is  
239 for governments to identify alternatives to detention so that incarceration is used only as a last  
240 resort. Prison releases have already begun as a means of reducing infectious disease transmission  
241 risk:(29) in an attempt to reduce the risk of COVID-19 in prisons, Brazil released more than thirty  
242 thousand people early by mid-2020.(30)

243 Our study has several limitations. First, while we were able to enroll a majority of *M.*  
244 *tuberculosis* isolates from incarcerated people with tuberculosis in the city of Dourados, overall  
245 sampling of the state's ongoing tuberculosis epidemic was incomplete. To minimize sampling  
246 bias, we determined genomic sampling probabilities and adjusted transmission probabilities to  
247 account for over-sampling of prisons. Our probabilistic approach allows us to account for  
248 uncertainty in transmission linkages; however, we still cannot infer the identity or incarceration  
249 history of unsampled people who contribute to transmission. Terminal branch lengths may  
250 similarly be affected by sampling bias or pathogen population size and are thus an imperfect  
251 proxy of recency of transmission.

252 Second, transmission trees reflect information from timed *M. tuberculosis* phylogenies  
253 and epidemiological priors. It is difficult to distinguish genomic sampling proportion from  
254 generation time and sampling time distributions. Because we conducted transmission inference in  
255 a tuberculosis-endemic setting, rather than in a discrete outbreak, our rate of genomic sampling

256 was lower than in some previous tuberculosis transmission studies. To reduce uncertainty in  
257 sampling proportion, we conducted transmission inference on recent subtrees (MRCA > 2012) for  
258 which we had sampled a greater proportion of isolates. To investigate the influence of  
259 epidemiological priors on transmission inferences, we conducted a sensitivity analysis (Table S2)  
260 and found that our conclusions were largely unchanged (Supplementary Text, Figs. S3-S6).

261 Third, we conducted whole genome sequencing of *M. tuberculosis* isolates cultured from  
262 sputum and generated single consensus genomes from each participant. Excluding within-host  
263 diversity could lead to some incorrect transmission inferences. For example, if we sampled an *M.*  
264 *tuberculosis* genome that was genetically distant from the genome that was transmitted, we could  
265 incorrectly exclude transmission.

266 Finally, we employed an existing bioinformatic approach to identify *M. tuberculosis*  
267 variants and excluded repetitive genomic regions as is common practice.(31, 32) Future studies  
268 that leverage within-host *M. tuberculosis* diversity and/or include the diverse PE/PPE genes could  
269 provide greater resolution and reduce the uncertainty of transmission inferences.(33)

270 In this study, we present genomic evidence that prisons act as tuberculosis reservoirs in  
271 Central West, Brazil. The dramatic expansion of incarceration in recent decades has put an  
272 increasing population at extremely high risk of tuberculosis; this risk extends to surrounding  
273 communities. Reducing the excess tuberculosis transmission risk within prisons and other  
274 detention centers is an urgent public health priority. Our findings additionally highlight the  
275 potential for pathogen genomic surveillance to identify other key environments or core  
276 populations with a disproportionate role in pathogen transmission and guide public health  
277 priorities.

278

## 279 **Materials and Methods**

### 280 **Study design**

281 We conducted population-based tuberculosis surveillance in the state of Mato Grosso do  
282 Sul in Central West Brazil from January 2014 through May 2019. Surveillance included active  
283 screening in three of the largest prisons in the state as well as ongoing passive surveillance  
284 focused on the two largest cities in the state, Campo Grande and Dourados, and three cities at the  
285 state's border with Paraguay and Bolivia (Fig. 1a,b; **Supplementary Methods**). All participants  
286 provided written consent, and this study was conducted with the approval of the Research Ethics  
287 Committee from the Federal University of Grande Dourados, Federal University of Mato Grosso  
288 do Sul and National Research Ethics Committee (CONEP) (CAAE 37237814.4.0000.5160,  
289 2676613.3.1001.5160, and 26620619.6.0000.0021) and Stanford University Institutional Review  
290 Board (IRB-40285).

### 291 **Incarceration history**

292 To investigate the incarceration history of tuberculosis patients more closely, we obtained  
293 permission from the Mato Grosso do Sul state prison administration agency, Agência Estadual de  
294 Administração do Sistema Penitenciário, to access a database of all prison entries, exits, and  
295 transfers within the criminal justice record system, Sistema Integrado de Gestão Operacional,  
296 from January 1, 2005 through December 31, 2018. Brazil's national criminal law defines different  
297 "regimes" or stages of incarceration(34), which may facilitate the potential for spillover of  
298 infection. People are incarcerated under closed regimes, within prisons; semi-open regimes, in  
299 which people may work outside prisons and return at night; and open regimes, under which  
300 people serve sentences outside of prison, but are required to make periodic court appearances.(34)

### 301 **Whole genome sequencing**

302 We sequenced whole genomes from cultured isolates on an Illumina NextSeq (2 x 151-  
303 bp). Sequence data is available on the Sequence Read Archive (SRA), in BioProject  
304 PRJNA671770. We applied variant calling methods closely following those described in Menardo

305 et al.(31) to be consistent with the methods used for molecular clock estimation (**Supplementary**  
306 **Methods**).

### 307 **Phylogenetic and Bayesian evolutionary analysis**

308 We fit maximum likelihood trees with RAxML-ng 1.0.1.(35) For each cluster including  
309 three or more isolates, we fit Bayesian trees with BEAST 2.6.2(36) with a strict clock, constant  
310 coalescent population size model using tuberculosis notification dates to calibrate tips  
311 (**Supplementary Methods**).

### 312 **Transmission inference**

313 *M. tuberculosis* phylogenetic trees represent patterns of evolutionary relatedness between  
314 the consensus bacterial genomes sampled from different individuals. Because most outbreaks are  
315 incompletely sampled (i.e. an *M. tuberculosis* sequence is not available for every case) and  
316 individuals may be infected with diverse populations of *M. tuberculosis*, phylogenies do not  
317 represent the underlying history of transmission.(19) We used TransPhylo(19) to infer  
318 transmission linkages—including unsampled hosts—that were consistent with the underlying  
319 timed phylogenies and transmission process (i.e. generation time and sampling intervals). To  
320 focus on densely sampled trees that would not be dominated by unsampled hosts, we sliced  
321 phylogenies at 2012 in order to generate subtrees with a most recent common ancestor of 2012 or  
322 later for transmission inference, including 122 subtrees each with 2 to 23 tips and comprising  
323 56% of isolates (528/935).

324 By sampling from the posterior distribution of transmission trees, we estimated the  
325 posterior probability that each individual within a transmission tree was infected by each other  
326 individual in the tree. We summarized the posterior set of transmission trees in TransPhylo with  
327 who acquired infection from whom (WAIFW) matrices,  $W$ , where  $W_{i,j}$  is the posterior probability  
328 of transmission from individual  $j$  to individual  $i$ . Many transmission events are unobserved  
329 because of incomplete sampling; therefore, the sum of transmission probabilities to any individual

330 is often less than one. We combined transmission trees with incarceration histories to quantify the  
331 proportion of observed transmission attributable to people with a history of incarceration. An  
332 individual's location at the time of their tuberculosis notification may not reflect where  
333 transmission occurred. To understand where infector-recipient pairs were at the time transmission  
334 occurred, we integrated transmission trees with incarceration information (Fig. 4c). First, we used  
335 the transmission trees to infer the posterior distribution of infection times for each recipient  $i$ . We  
336 then partitioned the infector-recipient transmission probability  $W_{i,j}$  across the recipient's infection  
337 time distribution, resulting in  $W_{i_u,j_v}$ , the probability of transmission from individual  $j$  to  
338 individual  $i$  while  $j$  has incarceration status  $v$  and  $i$  has incarceration status  $u$ . Incarceration status  
339 was trichotomized as incarcerated, formerly incarcerated, and no incarceration history.

340 We then summed pairwise, location-specific transmission probabilities over all individual  
341 subtrees with respect to the incarceration status of both infector  $j$  and recipient  $i$ . We defined the  
342 population wide transmission matrix,  $T_{u,v} = \sum_i \sum_j W_{i_u,j_v}$ , where  $T_{u,v}$  is the sum of the posterior  
343 probabilities of observed transmission events to individuals in population  $u$  from individuals in  
344 population  $v$ . We normalized  $T_{u,v}$  by dividing by the sum of posterior transmission probabilities  
345 to each recipient population  $u$ ,  $N_u = \sum_v T_{u,v}$ . We then defined the uncorrected proportion of the  
346 total posterior transmission probabilities to population  $u$  from population  $v$ , or the transmission  
347 fraction, as  $p_{u,v} = \frac{T_{u,v}}{N_u}$ .

348 Genomic sampling varied across populations and specifically, we predicted that  
349 incarcerated people might have been sampled at a higher rate due to our active case finding and  
350 greater culture coverage in three prisons in the state. To correct for sampling bias, we determined  
351 the genomic sampling proportion  $r_k$ , which we defined as the proportion of notified tuberculosis  
352 cases for which a high-quality genomic sequence was available, for population  $k$  at the time of  
353 tuberculosis notification. We calculated genomic sampling proportion as the number of sequenced  
354 genomes for each group divided by the number of tuberculosis notifications for each group from

355 2014-2019 in Campo Grande and Dourados, the two major cities in our prospective study (Fig.  
356 S2). We adjusted each pairwise transmission probability by the sampling rate of the infector,  
357 based on the incarceration status of the infector at the time of tuberculosis notification, for  $j \in$   
358  $k$ :  $W'_{i,j} = W_{i,j} \frac{1}{r_k}$  and calculated the sampling-adjusted transmission fractions as described above.

### 359 **Role of the funding source**

360 The funding source had no role in study design, data collection, data analysis, data interpretation,  
361 or writing of the report.

### 362 **Statistical methods**

363 We inferred transmission trees with TransPhylo(19) as described above. We compared  
364 phylogenetic tree terminal branch lengths between populations with two-sample t-tests and  
365 compared the rate of clustering between populations with two-sample proportion tests.

### 367 **References**

- 368
- 369 1. G. Churchyard, P. Kim, N. S. Shah, R. Rustomjee, N. Gandhi, B. Mathema, D. Dowdy, A.  
370 Kasmar, V. Cardenas, What We Know about Tuberculosis Transmission: An Overview, *J. Infect.*  
371 *Dis.* **216**, S629–S635 (2017).
  - 372 2. S. C. Auld, N. Sarita Shah, B. Mathema, T. S. Brown, N. Ismail, S. V. Omar, J. C. M. Brust, K.  
373 N. Nelson, S. Allana, A. Campbell, K. Mlisana, P. Moodley, N. R. Gandhi, Extensively drug-  
374 resistant tuberculosis in South Africa: Genomic evidence supporting transmission in communities,  
375 *Eur. Respir. J.* **52** (2018), doi:10.1183/13993003.00246-2018.
  - 376 3. K. Middelkoop, B. Mathema, L. Myer, E. Shashkina, A. Whitelaw, G. Kaplan, B. Kreiswirth,  
377 R. Wood, L. G. Bekker, Transmission of tuberculosis in a south African community with a high  
378 prevalence of HIV infection, *J. Infect. Dis.* **211**, 53–61 (2015).
  - 379 4. J. R. Andrews, C. Morrow, R. P. Walensky, R. Wood, Integrating social contact and



- 380 environmental data in evaluating tuberculosis transmission in a South African township., *J. Infect.*  
381 *Dis.* **210**, 597–603 (2014).
- 382 5. T. A. Yates, P. Y. Khan, G. M. Knight, J. G. Taylor, T. D. McHugh, M. Lipman, R. G. White,  
383 T. Cohen, F. G. Cobelens, R. Wood, D. A. J. Moore, I. Abubakar, The transmission of  
384 *Mycobacterium tuberculosis* in high burden settings, *Lancet Infect. Dis.* **16**, 227–238 (2016).
- 385 6. J. R. Andrews, C. Morrow, R. Wood, Modeling the role of public transportation in sustaining  
386 tuberculosis transmission in South Africa, *Am. J. Epidemiol.* **177**, 556–561 (2013).
- 387 7. K. Dolan, A. L. Wirtz, B. Moazen, M. Ndeffo-mbah, A. Galvani, S. A. Kinner, R. Courtney,  
388 M. McKee, J. J. Amon, L. Maher, M. Hellard, C. Beyrer, F. L. Altice, Global burden of HIV,  
389 viral hepatitis, and tuberculosis in prisoners and detainees, *Lancet* **388**, 1089–1102 (2016).
- 390 8. O. Cords, L. Martinez, J. Warren, J. O’Marr, K. S. Walter, T. Cohen, J. Zheng, A. I. Ko, J.  
391 Croda, J. R. Andrews, Incidence and Prevalence of Tuberculosis in Incarcerated Populations: A  
392 Systematic Review and Meta-analysis, *Lancet Public Heal.* .
- 393 9. J. Urrego, A. I. Ko, A. Da Silva Santos Carbone, D. S. G. Paião, R. V. E. Sgarbi, C. W. Yeckel,  
394 J. R. Andrews, J. Croda, The impact of ventilation and early diagnosis on tuberculosis  
395 transmission in Brazilian prisons, *Am. J. Trop. Med. Hyg.* **93**, 739–746 (2015).
- 396 10. S. Basu, D. Stuckler, M. McKee, Addressing institutional amplifiers in the dynamics and  
397 control of tuberculosis epidemics, *Am. J. Trop. Med. Hyg.* **84**, 30–37 (2011).
- 398 11. T. S. Mabud, M. de Lourdes Delgado Alves, A. I. Ko, S. Basu, K. S. Walter, T. Cohen, B.  
399 Mathema, C. Colijn, E. Lemos, J. Croda, J. R. Andrews, J. Z. Metcalfe, Ed. Evaluating strategies  
400 for control of tuberculosis in prisons and prevention of spillover into communities: An  
401 observational and modeling study from Brazil, *PLoS Med.* **16**, e1002737 (2019).
- 402 12. K. Walter, L. Martinez, Arakaki-Sanchez, V. Sequera, S. G. Estigarribia, T. Cohen, A. Ko, A.  
403 García-Basteiro, Z. Rueda, O. R. Lopez, M. Espinal, J. Croda, J. Andrews, The escalating  
404 tuberculosis crisis in Central and South American prisons. In press., *Lancet* (2020),

- 405 doi:10.1016/S0140-6736(20)32578-2.
- 406 13. F. P. C. Sacchi, R. M. Praça, M. B. Tatara, V. Simonsen, L. Ferrazoli, M. G. Croda, P. N.  
407 Suffys, A. I. Ko, J. R. Andrews, J. Croda, Prisons as reservoir for community transmission of  
408 tuberculosis, brazil, *Emerg. Infect. Dis.* **21**, 452–455 (2015).
- 409 14. R. Coker, M. McKee, R. Atun, B. Dimitrova, E. Dodonova, S. Kuznetsov, F. Drobniowski,  
410 Risk factors for pulmonary tuberculosis in Russia: Case-control study, *Br. Med. J.* **332**, 85–87  
411 (2006).
- 412 15. J. L. Warren, L. Grandjean, D. A. J. Moore, A. Lithgow, J. Coronel, P. Sheen, J. L. Zelner, J.  
413 R. Andrews, T. Cohen, Investigating spillover of multidrug-resistant tuberculosis from a prison: a  
414 spatial and molecular epidemiological analysis, *BMC Med.* **16**, 122 (2018).
- 415 16. H. E. Jenkins, V. Plesca, A. Ciobanu, V. Crudu, I. Galusca, V. Soltan, A. Serbulenco, M.  
416 Zignol, A. Dadu, M. Dara, T. Cohen, Assessing spatial heterogeneity of multidrug-resistant  
417 tuberculosis in a high-burden country, *Eur. Respir. J.* **42**, 1291–1301 (2013).
- 418 17. M. N. Séraphin, X. Didelot, D. J. Nolan, J. R. May, M. S. R. Khan, E. R. Murray, M. Salemi,  
419 J. G. Morris, M. Lauzardo, Genomic investigation of a *Mycobacterium tuberculosis* outbreak  
420 involving prison and community cases in Florida, United States, *Am. J. Trop. Med. Hyg.* **99**, 867–  
421 874 (2018).
- 422 18. T. F. Jones, C. L. Woodley, F. F. Fountain, W. Schaffner, Increased incidence of the outbreak  
423 strain of *Mycobacterium tuberculosis* in the surrounding community after an outbreak in a jail.  
424 (Original Article), *South. Med. J.* **96**, 155–158 (2003).
- 425 19. X. Didelot, C. Fraser, J. Gardy, C. Colijn, H. Malik, Genomic infectious disease epidemiology  
426 in partially sampled and ongoing outbreaks, *Mol. Biol. Evol.* **34**, 997–1007 (2017).
- 427 20. World Health Organization, *Global tuberculosis report 2020* (Geneva, 2020).
- 428 21. K. E. Holt, P. Mcadam, P. Vuong, K. Thai, N. Thuy, T. Thuong, D. Thi, M. Ha, N. N. Lan, N.  
429 H. Lan, N. Thi, Q. Nhu, H. T. Hai, V. Thi, N. Ha, G. Thwaites, D. J. Edwards, A. P. Nath, K.

- 430 Pham, D. B. Ascher, J. Farrar, C. C. Khor, Y. Y. Teo, M. Inouye, Frequent transmission of the  
431 *Mycobacterium tuberculosis* Beijing lineage and positive selection for the EsxW Beijing variant  
432 in Vietnam, *Nat. Genet.* (2018), doi:10.1038/s41588-018-0117-9.
- 433 22. T. M. Walker, T. A. Kohl, S. V. Omar, J. Hedge, C. Del Ojo Elias, P. Bradley, Z. Iqbal, S.  
434 Feuerriegel, K. E. Niehaus, D. J. Wilson, D. A. Clifton, G. Kapatai, C. L. C. Ip, R. Bowden, F. A.  
435 Drobniowski, C. Allix-Béguec, C. Gaudin, J. Parkhill, R. Diel, P. Supply, D. W. Crook, E. G.  
436 Smith, A. S. Walker, N. Ismail, S. Niemann, T. E. A. Peto, J. Davies, C. Crichton, M. Acharya, L.  
437 Madrid-Marquez, D. Eyre, D. Wyllie, T. Golubchik, M. Munang, Whole-genome sequencing for  
438 prediction of *Mycobacterium tuberculosis* drug susceptibility and resistance: A retrospective  
439 cohort study, *Lancet Infect. Dis.* **15**, 1193–1202 (2015).
- 440 23. T. M. Walker, C. L. C. Ip, R. H. Harrell, J. T. Evans, G. Kapatai, M. J. Dedicoat, D. W. Eyre,  
441 D. J. Wilson, P. M. Hawkey, D. W. Crook, J. Parkhill, D. Harris, A. S. Walker, R. Bowden, P.  
442 Monk, E. G. Smith, T. E. A. Peto, Whole-genome sequencing to delineate *Mycobacterium*  
443 *tuberculosis* outbreaks: A retrospective observational study, *Lancet Infect. Dis.* **13**, 137–146  
444 (2013).
- 445 24. F. Drobniowski, Y. Balabanova, V. Nikolayevsky, M. Ruddy, S. Kuznetsov, S. Zakharova, A.  
446 Melentyev, I. Fedorin, Drug-resistant tuberculosis, clinical virulence, and the dominance of the  
447 Beijing strain family in Russia, *J. Am. Med. Assoc.* **293**, 2726–2731 (2005).
- 448 25. J. W. Tappero, R. Reporter, J. D. Wenger, B. A. Ward, M. W. Reeves, T. S. Missbach, B. D.  
449 Plikaytis, L. Mascola, A. Schuchat, Meningococcal Disease in Los Angeles County, California,  
450 and among Men in the County Jails, *N. Engl. J. Med.* **335**, 833–841 (1996).
- 451 26. E. Reinhart, D. L. Chen, Incarceration And Its Disseminations: COVID-19 Pandemic Lessons  
452 From Chicago’s Cook County Jail, *Health Aff.* **39**, 1412–1418 (2020).
- 453 27. A. da S. Santos, R. D. de Oliveira, E. F. Lemos, F. Lima, T. Cohen, O. Cords, L. Martinez, C.  
454 Gonçalves, A. I. Ko, J. R. Andrews, J. Croda, Yield, Efficiency, and Costs of Mass Screening

- 455 Algorithms for Tuberculosis in Brazilian Prisons, *Clin. Infect. Dis.* (2020),  
456 doi:10.1093/cid/ciaa135.
- 457 28. R. D. de Oliveira, A. da Silva Santos, C. B. Reis, A. de Cássia Leite, F. P. C. Sacchi, R. C. P.  
458 de Araujo, P. C. P. dos Santos, V. C. Rolla, L. Martinez, J. Andrews, J. Croda, Primary  
459 prophylaxis to prevent tuberculosis infection in prison inmates: A randomized, double-blind,  
460 placebo-controlled trial, *Am. J. Trop. Med. Hyg.* **103**, 1466–1472 (2020).
- 461 29. E. A. Wang, B. Western, D. M. Berwick, COVID-19, Decarceration, and the Role of  
462 Clinicians, Health Systems, and Payers: A Report From the National Academy of Sciences,  
463 Engineering, and Medicine., *Jama* **06511** (2020), doi:10.1001/jama.2020.22109.
- 464 30. R. De Oliveira Andrade, Covid-19: Prisons exposed in Brazil's crisis *BMJ* **370** (2020),  
465 doi:10.1136/bmj.m2884.
- 466 31. F. Menardo, S. Duchêne, D. Brites, S. Gagneux, The molecular clock of mycobacterium  
467 tuberculosis, *PLoS Pathog.* **15** (2019), doi:10.1371/journal.ppat.1008067.
- 468 32. C. J. Meehan, G. A. Goig, T. A. Kohl, L. Verboven, A. Dippenaar, M. Ezewudo, M. R.  
469 Farhat, J. L. Guthrie, K. Laukens, P. Miotto, B. Ofori-Anyinam, V. Dreyer, P. Supply, A. Suresh,  
470 C. Utpatel, D. van Soolingen, Y. Zhou, P. M. Ashton, D. Brites, A. M. Cabibbe, B. C. de Jong, M.  
471 de Vos, F. Menardo, S. Gagneux, Q. Gao, T. H. Heupink, Q. Liu, C. Loiseau, L. Rigouts, T. C.  
472 Rodwell, E. Tagliani, T. M. Walker, R. M. Warren, Y. Zhao, M. Zignol, M. Schito, J. Gardy, D.  
473 M. Cirillo, S. Niemann, I. Comas, A. Van Rie, Whole genome sequencing of Mycobacterium  
474 tuberculosis: current standards and open issues, *Nat. Rev. Microbiol.* **17**, 533–545 (2019).
- 475 33. K. S. Walter, C. Colijn, T. Cohen, B. Mathema, Q. Liu, J. Bowers, D. M. Engelthaler, A.  
476 Narechania, D. Lemmer, J. Croda, J. R. Andrews, Genomic variant-identification methods may  
477 alter mycobacterium tuberculosis transmission inferences, *Microb. Genomics* **6**, 1–16 (2020).
- 478 34. J. Mariner, J. Cavallaro, *Behind Bars in Brazil* (Human Rights Watch, New York, 1998).
- 479 35. A. M. Kozlov, D. Darriba, T. Flouri, B. Morel, A. Stamatakis, J. Wren, Ed. RAxML-NG: A

- 480 fast, scalable, and user-friendly tool for maximum likelihood phylogenetic inference,  
481 *Bioinformatics* (2019), doi:10.1093/bioinformatics/btz305.
- 482 36. R. Bouckaert, T. G. Vaughan, J. Barido-Sottani, S. Duchêne, M. Fourment, A. Gavryushkina,  
483 J. Heled, G. Jones, D. Kühnert, N. De Maio, M. Matschiner, F. K. Mendes, N. F. Müller, H. A.  
484 Ogilvie, L. Du Plessis, A. Poppinga, A. Rambaut, D. Rasmussen, I. Siveroni, M. A. Suchard, C. H.  
485 Wu, D. Xie, C. Zhang, T. Stadler, A. J. Drummond, BEAST 2.5: An advanced software platform  
486 for Bayesian evolutionary analysis, *PLoS Comput. Biol.* **15**, e1006650 (2019).
- 487 37. A. da S. Santos, R. D. de Oliveira, E. F. Lemos, F. Lima, T. Cohen, O. Cords, L. Martinez, C.  
488 Gonçalves, A. Ko, J. R. Andrews, J. Croda, Yield, Efficiency and Costs of Mass Screening  
489 Algorithms for Tuberculosis in Brazilian Prisons., *Clin. Infect. Dis.* (2020),  
490 doi:10.1093/cid/ciaa135.
- 491 38. D. Robinson, fuzzyjoin: Join Tables Together on Inexact Matching (2020) (available at  
492 <https://github.com/dgrtwo/fuzzyjoin>).
- 493 39. F. Krueger, Trim Galore (2019) (available at  
494 [https://github.com/FelixKrueger/TrimGalore/blob/master/Docs/Trim\\_Galore\\_User\\_Guide.md](https://github.com/FelixKrueger/TrimGalore/blob/master/Docs/Trim_Galore_User_Guide.md)).
- 495 40. M. Martin, Cutadapt Removes Adapter Sequences From High-Throughput Sequencing Reads,  
496 *EMBnet.journal* **17** (2011), doi:<https://doi.org/10.14806/ej.17.1.200>.
- 497 41. D. E. Wood, S. L. Salzberg, Kraken: Ultrafast metagenomic sequence classification using  
498 exact alignments, *Genome Biol.* **15**, R46 (2014).
- 499 42. H. Li, R. Durbin, Fast and accurate short read alignment with Burrows-Wheeler transform,  
500 *Bioinformatics* **25**, 1754–1760 (2009).
- 501 43. D. Brites, C. Loiseau, F. Menardo, S. Borrell, M. B. Boniotti, R. Warren, A. Dippenaar, S. D.  
502 C. Parsons, C. Beisel, M. A. Behr, J. A. Fyfe, M. Coscolla, S. Gagneux, A new phylogenetic  
503 framework for the animal-adapted mycobacterium tuberculosis complex, *Front. Microbiol.* **9**,  
504 2820 (2018).

- 505 44. C. Anyansi, A. Keo, B. J. Walker, T. J. Straub, A. L. Manson, A. M. Earl, T. Abeel,  
506 QuantTB- A method to classify mixed Mycobacterium tuberculosis infections within whole  
507 genome sequencing data, *BMC Genomics* **21**, 80 (2020).
- 508 45. A. J. Page, S. R. Harris, T. Seemann, B. Taylor, A. J. Delaney, J. A. Keane, J. Soares, SNP-  
509 sites: rapid efficient extraction of SNPs from multi-FASTA alignments, *Microb. Genomics* **2**, 1–5  
510 (2016).
- 511 46. P. Bradley, N. C. Gordon, T. M. Walker, L. Dunn, S. Heys, B. Huang, S. Earle, L. J.  
512 Pankhurst, L. Anson, M. De Cesare, P. Piazza, A. A. Votintseva, T. Golubchik, D. J. Wilson, D.  
513 H. Wyllie, R. Diel, S. Niemann, S. Feuerriegel, T. A. Kohl, N. Ismail, S. V Omar, E. G. Smith, D.  
514 Buck, G. McVean, A. S. Walker, T. E. A. Peto, D. W. Crook, Z. Iqbal, Rapid antibiotic-resistance  
515 predictions from genome sequence data for *Staphylococcus aureus* and *Mycobacterium*  
516 *tuberculosis*, *Nat. Commun.* **6** (2015), doi:10.1038/ncomms10063.
- 517 47. C. Allix-Béguet, I. Arandjelovic, L. Bi, P. Beckert, M. Bonnet, P. Bradley, A. M. Cabibbe, I.  
518 Cancino-Muñoz, M. J. Caulfield, A. Chaiprasert, D. M. Cirillo, D. A. Clifton, I. Comas, D. W.  
519 Crook, M. R. De Filippo, H. de Neeling, R. Diel, F. A. Drobniowski, K. Faksri, M. R. Farhat, J.  
520 Fleming, P. Fowler, T. A. Fowler, Q. Gao, J. Gardy, D. Gascoyne-Binzi, A. L. Gibertoni-Cruz, A.  
521 Gil-Brusola, T. Golubchik, X. Gonzalo, L. Grandjean, G. He, J. L. Guthrie, S. Hoosdally, M.  
522 Hunt, Z. Iqbal, N. Ismail, J. Johnston, F. M. Khanzada, C. C. Khor, T. A. Kohl, C. Kong, S.  
523 Lipworth, Q. Liu, G. Maphalala, E. Martinez, V. Mathys, M. Merker, P. Miotto, N. Mistry, D. A.  
524 J. Moore, M. Murray, S. Niemann, R. T. H. Ong, T. E. A. Peto, J. E. Posey, T. Prammananan, A.  
525 Pym, C. Rodrigues, M. Rodrigues, T. Rodwell, G. M. Rossolini, E. S. Padilla, M. Schito, X.  
526 Shen, J. Shendure, V. Sintchenko, A. Sloutsky, E. G. Smith, M. Snyder, K. Soetaert, A. M.  
527 Starks, P. Supply, P. Suriyapol, S. Tahseen, P. Tang, Y. Y. Teo, T. N. T. Thuong, G. Thwaites, E.  
528 Tortoli, S. V. Omar, D. van Soolingen, A. S. Walker, T. M. Walker, M. Wilcox, D. J. Wilson, D.  
529 Wyllie, Y. Yang, H. Zhang, Y. Zhao, B. Zhu, Prediction of susceptibility to first-line tuberculosis

- 530 drugs by DNA sequencing, *N. Engl. J. Med.* **379**, 1403–1415 (2018).
- 531 48. J. E. Phelan, D. M. O’Sullivan, D. Machado, J. Ramos, Y. E. A. Oppong, S. Campino, J.  
532 O’Grady, R. McNerney, M. L. Hibberd, M. Viveiros, J. F. Huggett, T. G. Clark, Integrating  
533 informatics tools and portable sequencing technology for rapid detection of resistance to anti-  
534 tuberculous drugs, *Genome Med.* **11**, 41 (2019).
- 535 49. E. Paradis, K. Schliep, R. Schwartz, Ed. ape 5.0: an environment for modern phylogenetics  
536 and evolutionary analyses in R, *Bioinformatics* **35**, 526–528 (2019).
- 537 50. A. D. Leaché, B. L. Banbury, J. Felsenstein, A. Nieto-Montes De Oca, A. Stamatakis, New  
538 Acquisition Bias Corrections for Inferring SNP Phylogenies, *Syst. Biol.* **64**, 1032–1047 (2015).
- 539 51. A. Rambaut, A. J. Drummond, D. Xie, G. Baele, M. A. Suchard, Posterior summarization in  
540 Bayesian phylogenetics using Tracer 1.7, *Syst. Biol.* **67**, 901–904 (2018).
- 541 52. A. Rieux, C. E. Khatchikian, tipdatingbeast: an r package to assist the implementation of  
542 phylogenetic tip-dating tests using beast, *Mol. Ecol. Resour.* **17**, 608–613 (2017).
- 543 53. Y. I. Xu, I. Cancino-Muñoz, M. I. Torres-Puente, L. M. Villamayor, R. I. Borrá, M. Borrá s-  
544 Máñez, M. Bosque, J. J. Camarena ID, E. Colomer-Roig, J. I. Colomina, I. Escribano, O. I.  
545 Esparcia-Rodríguez, A. I. Gil-Brusola, R. Moreno-Muñoz, D. NavarroID, M. Navarro, N. Orta, E.  
546 Pérez, J. Prat, J. I. Carlos Rodríguez, M. Montserrat Ruiz-García, H. Vanaclocha, C. ColijnID, I.  
547 I. Comas, I. Cancino-Munoz, M. I. Torres-Puente, L. M. Villamayor, R. Borrás, M. Borrás-  
548 Máñez, M. Bosque, J. J. Camarena, E. Colomer-Roig, J. I. Colomina, I. Escribano, O. I. Esparcia-  
549 Rodríguez, A. I. Gil-Brusola, C. Gimeno, A. Gimeno-Gascón, B. Gomila-Sard, D. González-  
550 Granda, N. Gonzalo-Jiménez, M. R. Guna-Serrano, J. L. López-Hontangas, C. Martín-González,  
551 R. Moreno-Munoz, D. Navarro, M. Navarro, N. Orta, E. Pérez, J. Prat, J. C. Rodríguez, M. M.  
552 Ruiz-García, H. Vanaclocha, C. Colijn, I. I. Comas, High-resolution mapping of tuberculosis  
553 transmission: Whole genome sequencing and phylogenetic modelling of a cohort from Valencia  
554 Region, Spain, *PLoS Med.* **16** (2019), doi:10.1371/journal.pmed.1002961.

555 54. D. Ayabina, J. O. Ronning, K. Alfsnes, N. Debech, O. B. Brynildsrud, T. Arnesen, G.  
556 Norheim, A.-T. T. Mengshoel, R. Rykkvin, U. R. Dahle, C. Colijn, V. Eldholm, Genome-based  
557 transmission modelling separates imported tuberculosis from recent transmission within an  
558 immigrant population, *Microb. Genomics* **4**, 1–13 (2018).

559

## 560 **Acknowledgments**

561

562 We would like to acknowledge the contributions of AGEPEN, LACEN, and the Mato  
563 Grosso do Sul State Health Department. All authors had full access to all the data in the  
564 study and had final responsibility for the decision to submit

565

## 566 **Funding:**

567 National Institutes of Health grant R01AI130058 (JRA)

568 Brazil's National Council for Scientific and Technological Development  
569 grant 404237/2012-6 (JC)

570

## 571 **Author contributions:**

572 Conceptualization: JRA, JC, KSW, CC, TC, BM, AIK

573 Methodology: JRA, JC, KSW, CC, TC, BM, AIK

574 Investigation: PCPS, TOG, BOS, ASS, ACL, AMS, FMFM, RDO, EFL, EC, YL

575 Visualization: KSW, JRA

576 Funding acquisition: JRA, JC

577 Project administration: JRA, JC

578 Supervision: JRA, JC

579 Writing – original draft: KSW, JRA



580 Writing – review & editing: all authors

581  
582 **Competing interests:** Authors declare that they have no competing interests.

583  
584 **Data and materials availability:** Raw Illumina sequence data are available on the  
585 Sequence Read Archive under BioProject PRJNA671770.

586  
587 **Figures and Tables**

588  
589 **Figure 1. Tuberculosis is increasingly concentrated within prisons in Mato Grosso do Sul,**  
590 **Brazil.** (a) Map of Brazil with states colored by the 2019 incarceration rate with Mato Grosso do  
591 Sul outlined in black. (b) Map of Mato Grosso do Sul state with the cities with passive  
592 surveillance only and where active surveillance was additionally conducted within prisons. (c)  
593 The incarcerated population size in Mato Grosso do Sul grew by 142% from 2005 to 2020,  
594 increasing from 7,891 to 19,065 people. (d) Mato Grosso do Sul state’s annual new and  
595 retreatment tuberculosis notifications, colored by incarceration status and (e) the notification rate  
596 per 100,000 people for the incarcerated population and non-incarcerated populations from 2009 to  
597 2019. The y-axis is log-scaled. The mean tuberculosis notification rate was more than 46 times  
598 greater among the incarcerated population compared to the non-incarcerated population. The  
599 green and yellow bars (d) and (e) indicate the period of active surveillance in prisons in Campo  
600 Grande and Dourados respectively.

601  
602 **Figure 2. *M. tuberculosis* isolates from incarcerated and non-incarcerated people are closely**  
603 **related in Mato Grosso do Sul, Brazil.** A maximum likelihood phylogeny of 932 tuberculosis  
604 isolates from Lineage 4 inferred from a multiple sequence alignment of 19,753 SNPs. Branch

605 lengths are in units of substitutions per site. From the inside, rings are colored by incarceration  
606 status, antimicrobial resistance prediction, and genomic cluster (Methods). “Other” resistance  
607 indicates resistance to at least one antibiotic other than isoniazid or rifampicin. Branches are  
608 colored by sublineage. The clade containing the largest predicted genomic cluster (Cluster 5),  
609 including 170 isolates, is highlighted in purple.

610

611 **Figure 3. A single, recently emerged *M. tuberculosis* clone spans prisons and the community**  
612 **across the major cities Mato Grosso do Sul state.** (a) A Bayesian time-calibrated phylogeny of  
613 the largest sampled genomic cluster of 170 isolates. The cluster emerged approximately 23 years  
614 before the most recently sampled isolate, with a most recent common ancestor in 1996 (95%  
615 HPD: 1989-2003). Tip point color indicates patient’s incarceration status at the time of  
616 tuberculosis notification. Annotation bar colors indicate city. Grey error bars indicate the 95%  
617 Bayesian highest posterior density intervals for node date. Clade posterior support values are  
618 shown on the middle of branches for clades with posterior support  $> 0.5$ . (b) A haplotype network  
619 of the single largest genomic cluster, including 170 isolates. Nodes represent unique haplotypes  
620 and are scaled to size. Points along branches indicate SNP distances between haplotypes. Node  
621 color indicates incarceration status at the time of diagnosis.

622

623 **Figure 4. Prisons disseminate tuberculosis through the frequent movement of incarcerated**  
624 **people between prisons.** (a) Incarceration locates people within highly connected contact  
625 networks. Map of Mato Grosso do Sul state with orange points indicating the 21 prisons which  
626 most frequently transfer people between prisons. Edges are colored by the mean number of yearly  
627 transfers made between prisons from 2015-2018, including transfers in both directions. Edges  
628 were drawn between prison pairs with more than 10 transfers in the study period. Transfers  
629 between prisons within a city are not shown. (b) An *M. tuberculosis* clone (depicted in Figure 3)

630 spreads throughout multiple prisons, jails, and the community. Each line represents an individual  
631 patient infected with an isolate in the largest genomic cluster, ordered by notification date. Line  
632 color indicates patient location, determined by matching patient names with the state incarceration  
633 database (Methods). Points indicate TB notification dates; point color indicates patient location at  
634 the time of TB notification. Individuals with notification dates after December 31, 2018 are not  
635 shown.

636

637 **Figure 5. Frequent transmission within prisons and spillover of infection from prisons**

638 **perpetuates the tuberculosis epidemic in Mato Grosso do Sul, Brazil.** We integrated *M.*

639 *tuberculosis* phylogenetic trees with epidemiologic data to infer probable transmission linkages

640 among sampled patients as demonstrated by an example cluster (a-c). (a) Transmission histories

641 can be represented by a phylogenetic trees with branches colored by host in which tips represent

642 sampled isolates and transmission events are indicated by asterisks. (b) We summarized sampled

643 transmission trees into who-acquired-infection-from-whom matrices in which rows represent

644 individual recipients, columns represent individual infectors, and each cell is colored by pairwise

645 transmission probability. (c) The posterior distribution of infection times (grey histogram) for

646 individual d with bars below representing location information for individual d and individual c,

647 the predicted infector. Bars are colored by location over time and circles indicate date of

648 tuberculosis notification. (d) The population-wide WAIFW matrix describing the proportions of

649 observed transmissions to each recipient population from each infector population, corrected for

650 genomic sampling (Methods). Rows represent recipient populations, columns represent infector

651 populations, and cells indicate the proportion of total infections to each recipient population from

652 each infector population defined by their incarceration status at the time of transmission and

653 corrected for sampling rate.

654

655

**a**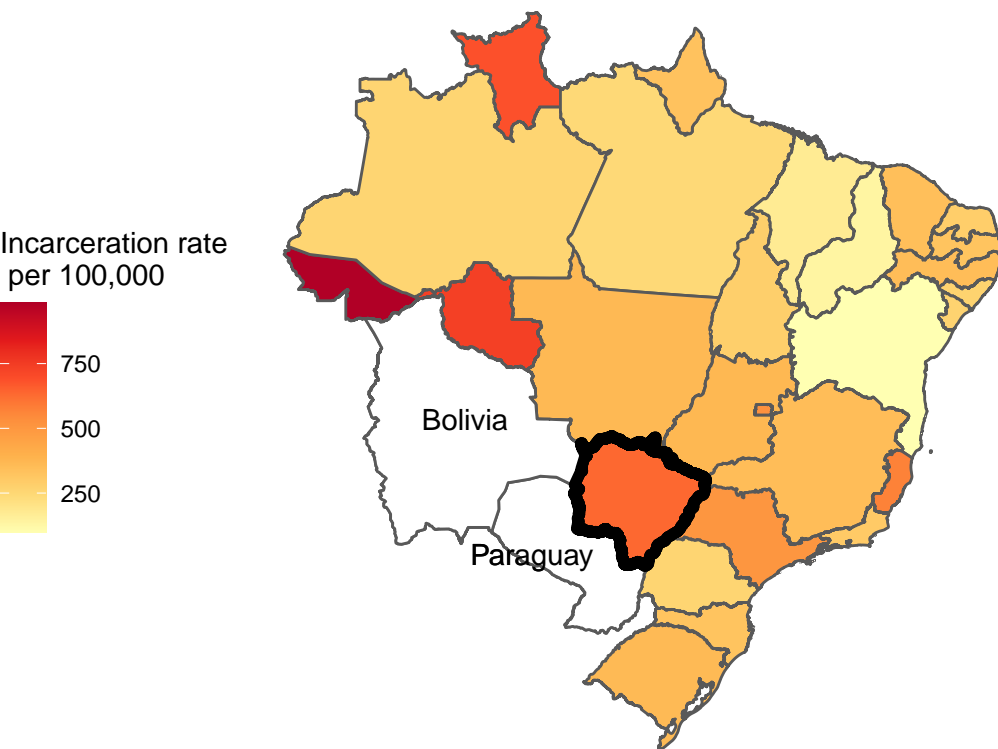**b**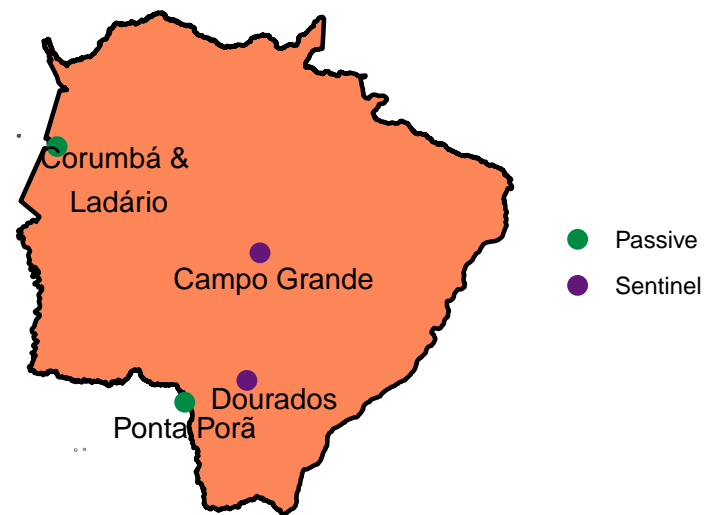

Incarceration status — Community — Incarcerated

**c**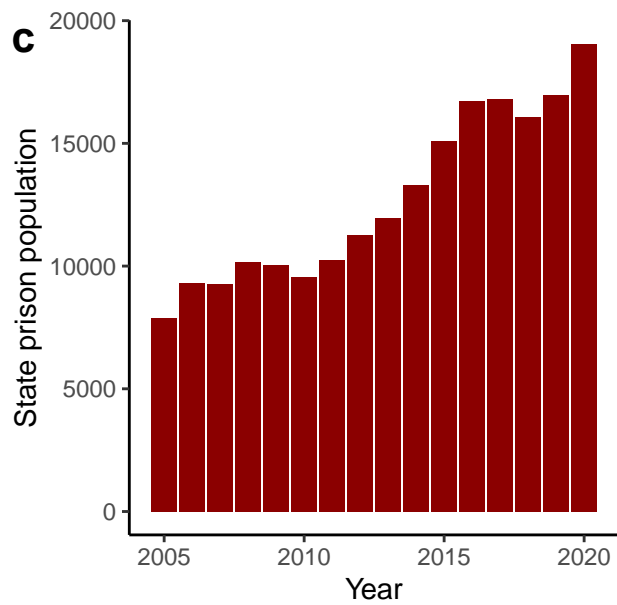**d**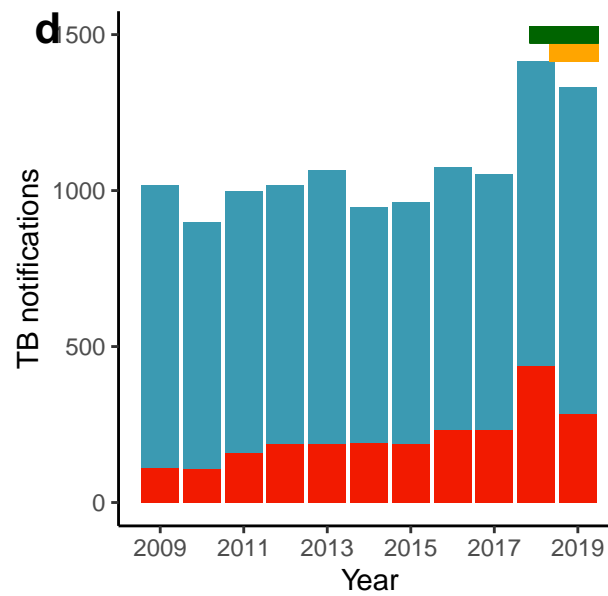**e**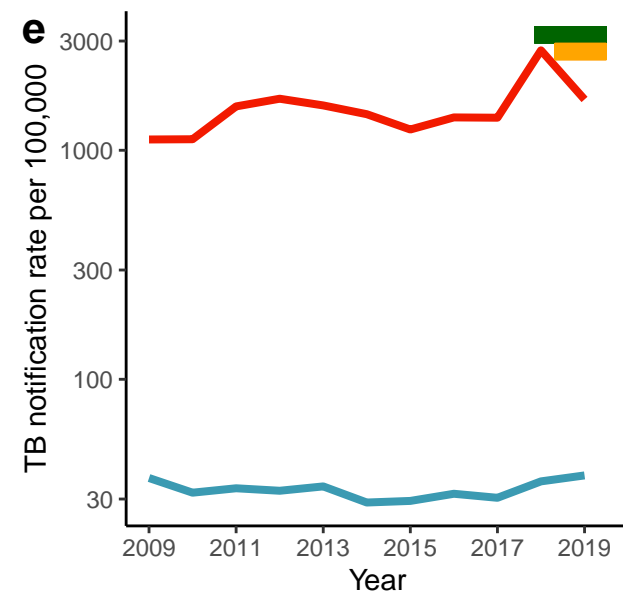

a) Incarceration status

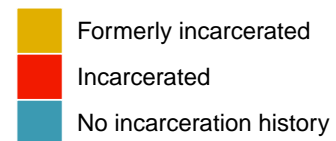

b) Antimicrobial resistance

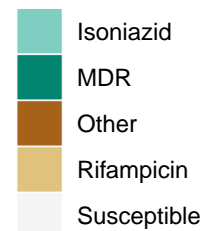

c) Genomic cluster

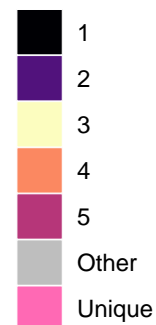

Lineage

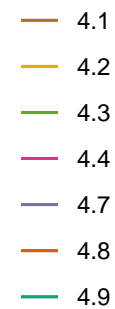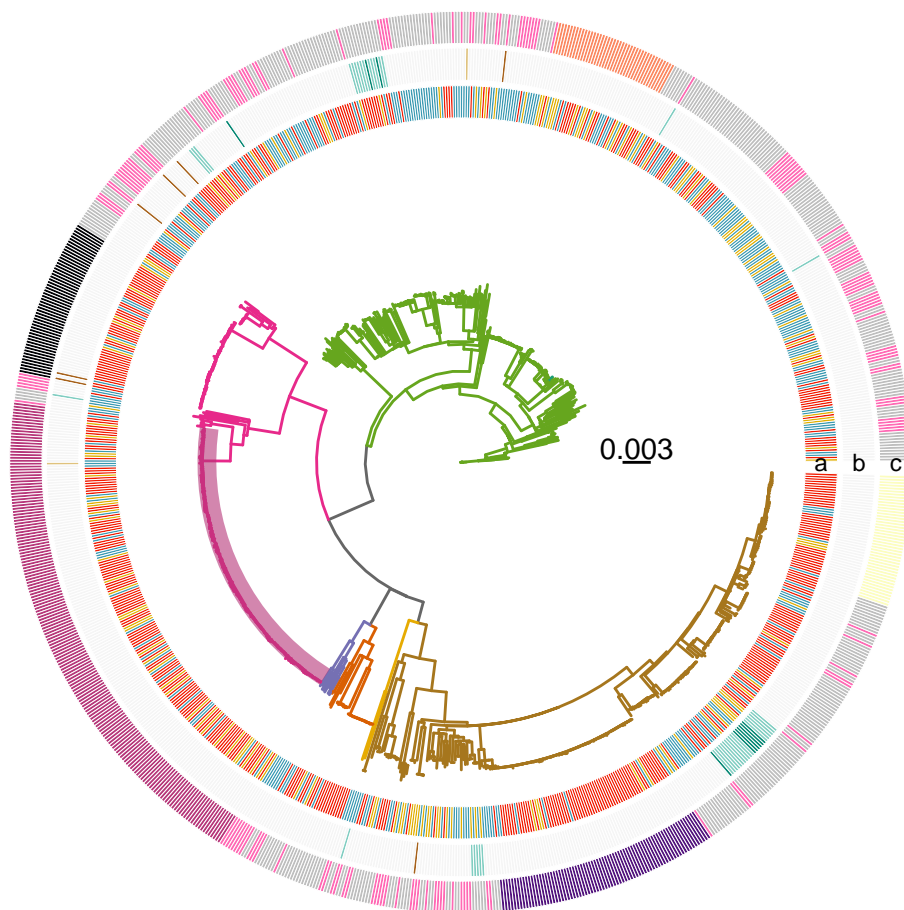

a

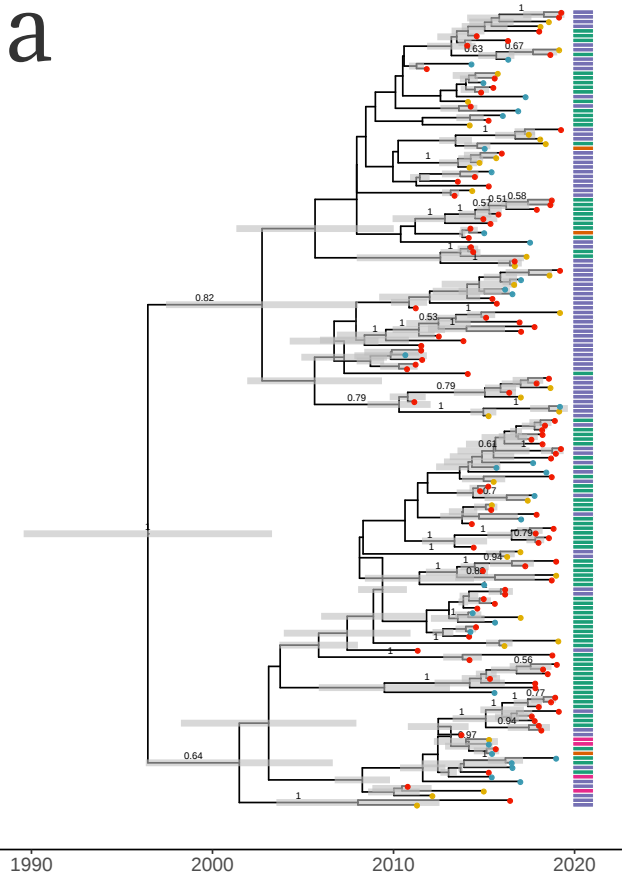

Incarceration status

- Formerly incarcerated
- Incarcerated
- No incarceration history

City

- Campo Grande
- Corumba/ Ladario
- Dourados
- Ponta Pora

b

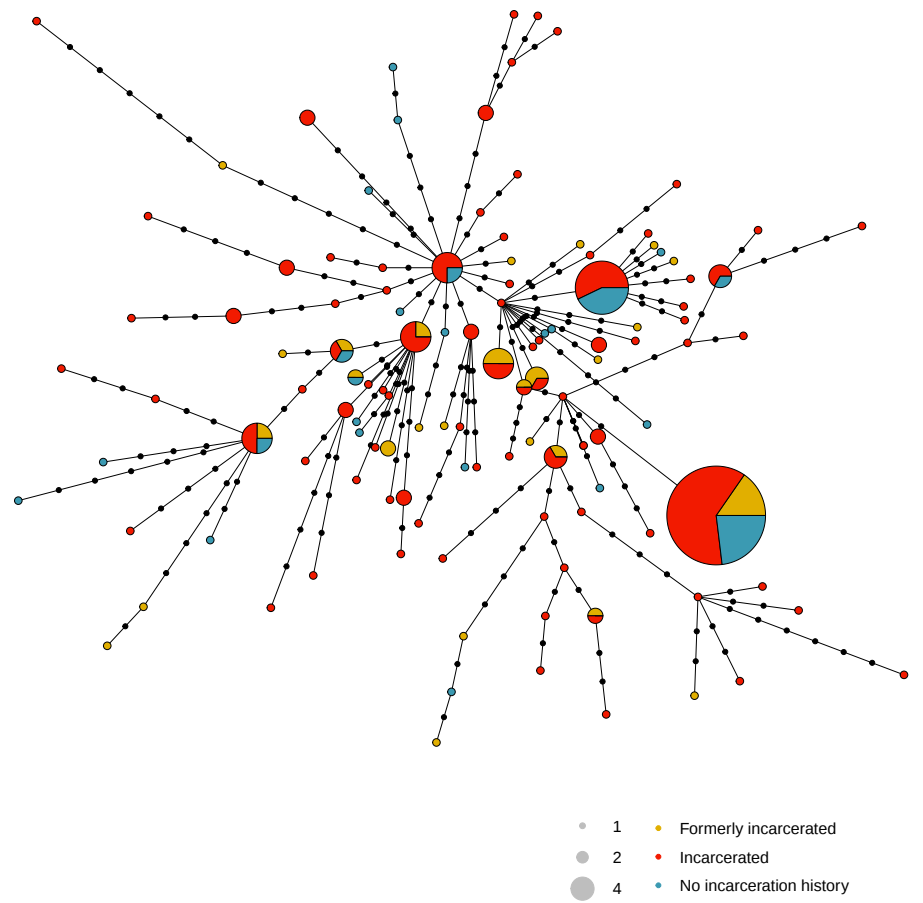

**a**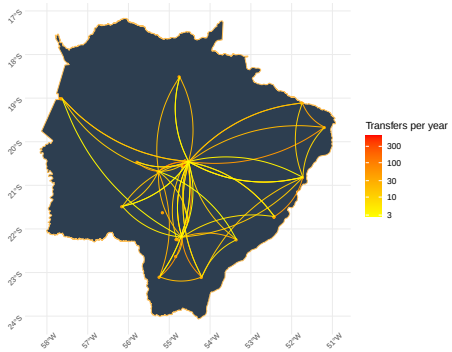**b**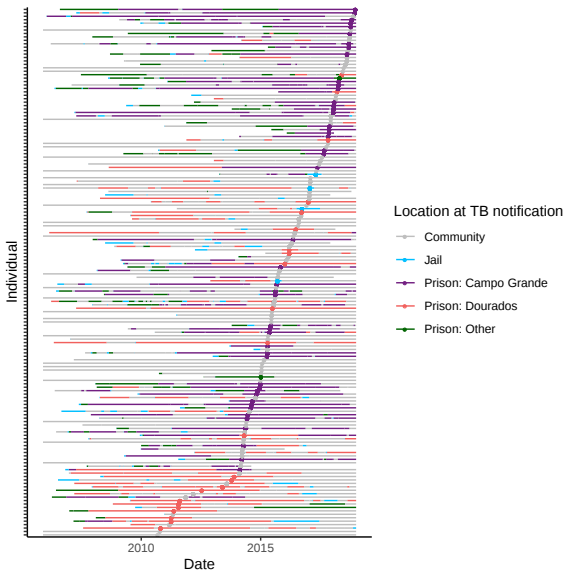

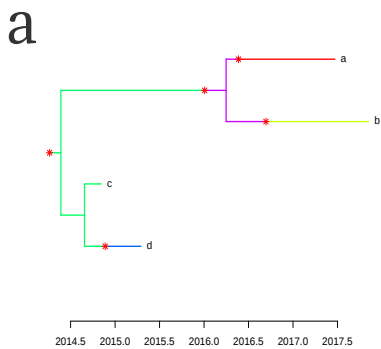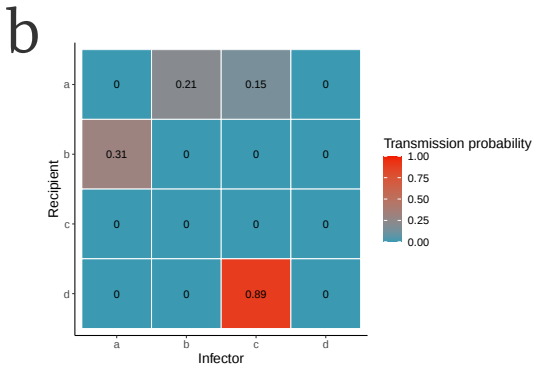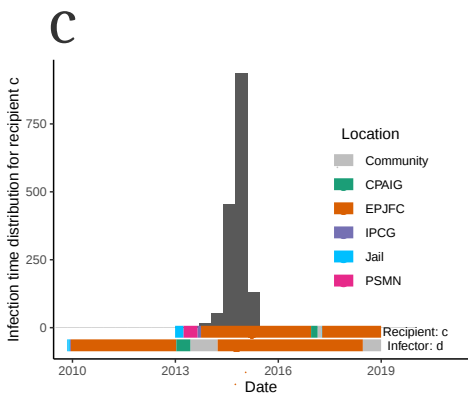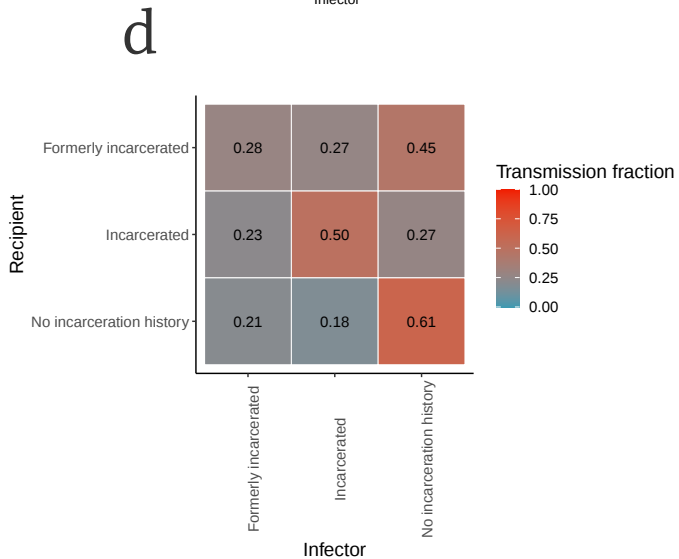

Source: https://www.medrxiv.org/content/medrxiv/early/2021/06/24/2021.06.22.21259360.full.pdf
